# Supplementary material for: Development of gut microbiota during the first 2 years of life
Source: PubMed Central journal article supplement (PMC9156670; doi:10.1038/s41598-022-13009-3), 2022-05-31
Supplement: 41598_2022_13009_MOESM1_ESM.pdf [file 41598_2022_13009_MOESM1_ESM.pdf]

SUPPLEMENTARY INFORMATION for

Development of gut microbiota during the first 2 years of life

Mona-Lisa Wernroth, Sari Peura, Anna M. Hedman, Susanne Hetty, Silvia Vicenzi, Beatrice Kennedy, Katja Fall, Bodil Svennblad, Erika Andolf, Göran Pershagen, Jenny Theorell-Haglöw, Diem Nguyen, Sergi Sayols-Baixeras, Koen F. Dekkers, Stefan Bertilsson, Catarina Almqvist, Johan Dicksved, Tove Fall

Supplementary Figure S1. Directed Acyclic Graph of theoretical framework to investigate the effect of mode of delivery on gut microbiota in children. A directed edge (or "arrow") from one node to another represents a direct effect between these two nodes.

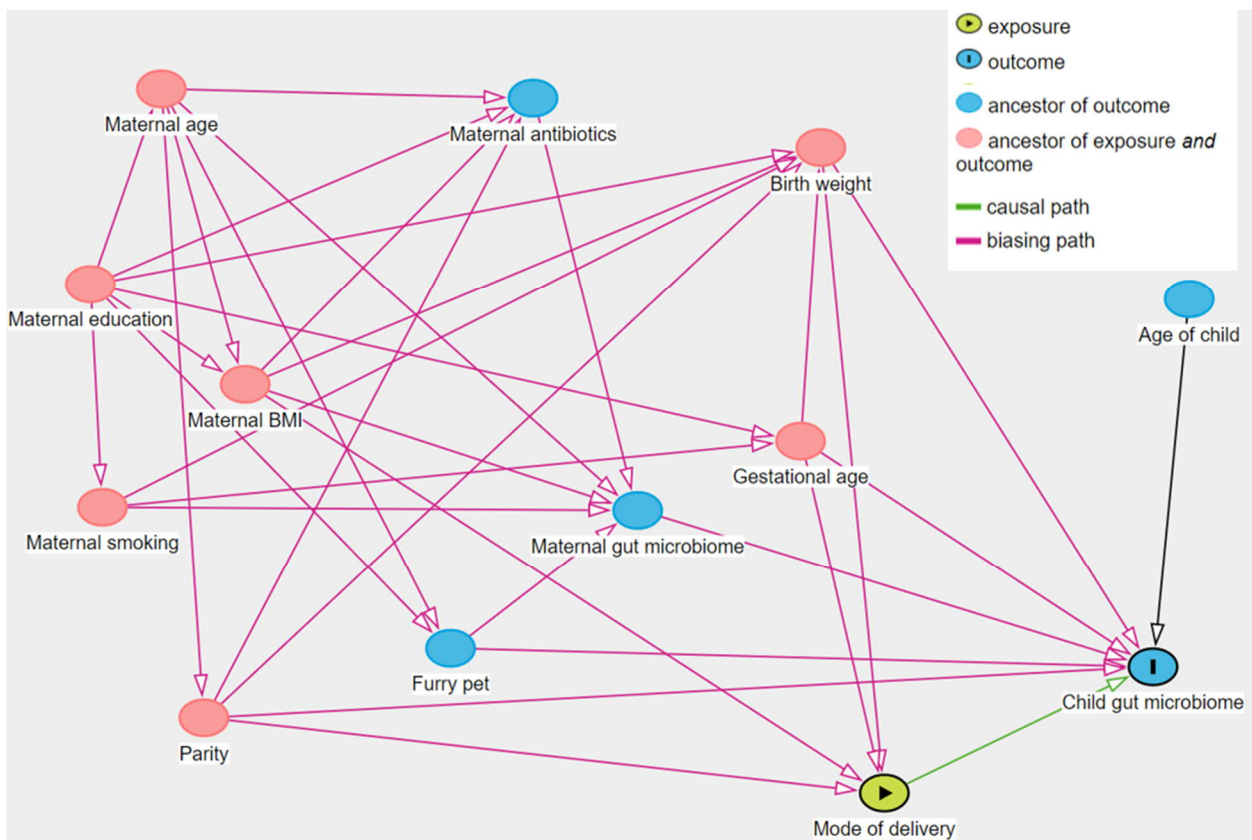

Supplementary Figure S2. Model-based predictions of the inverse Simpson index of the gut microbiota in children plotted against the age. Lines indicate mean values (solid) and 95% confidence intervals (dashed).

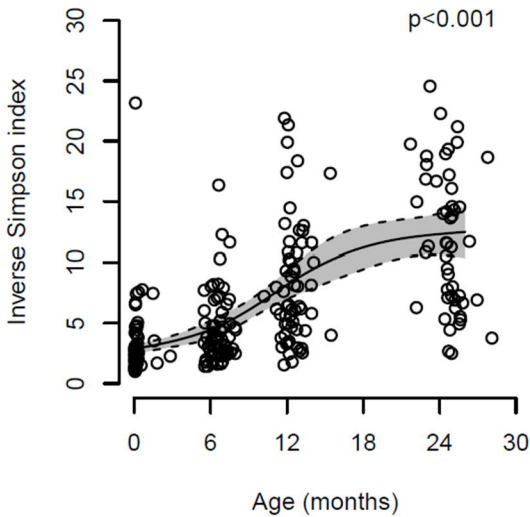

Supplementary Figure S3. Comparison of microbiota composition based on Jaccard distances. The shorter the distance between any pair of comparisons indicate greater similarity between microbial communities collected at those times. W = gestational week and m = month. Symbols represent means and error bars 95% confidence intervals. a Comparisons of gut microbiota at different sampling times, where distances between different sampling points within the same child/mother (self), and distances between unrelated children (non-self) and between unrelated mothers (non-self) are denoted. b Comparisons between gut and oral microbiota, and between children and their mothers and unrelated mothers. The distance between child and mother is based on the maternal sample at gestational week 26-28.

a

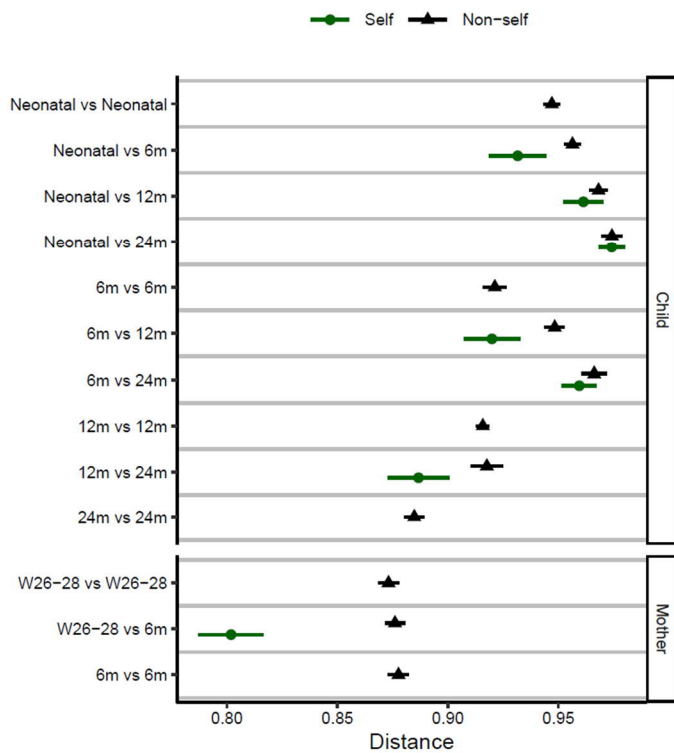

b

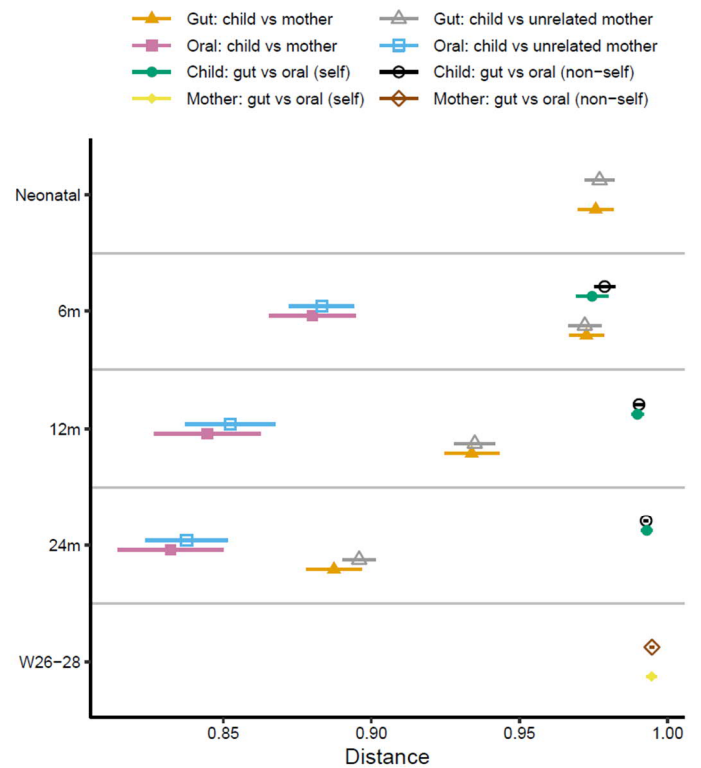

Supplementary Figure S4. Model-based predictions of relative abundance of families in the gut of children plotted against age. Lines indicate mean values (solid) and 95% confidence intervals (dashed). The y-axis shows the relative abundance in proportion. Only observations < 97<sup>th</sup> percentile are shown.

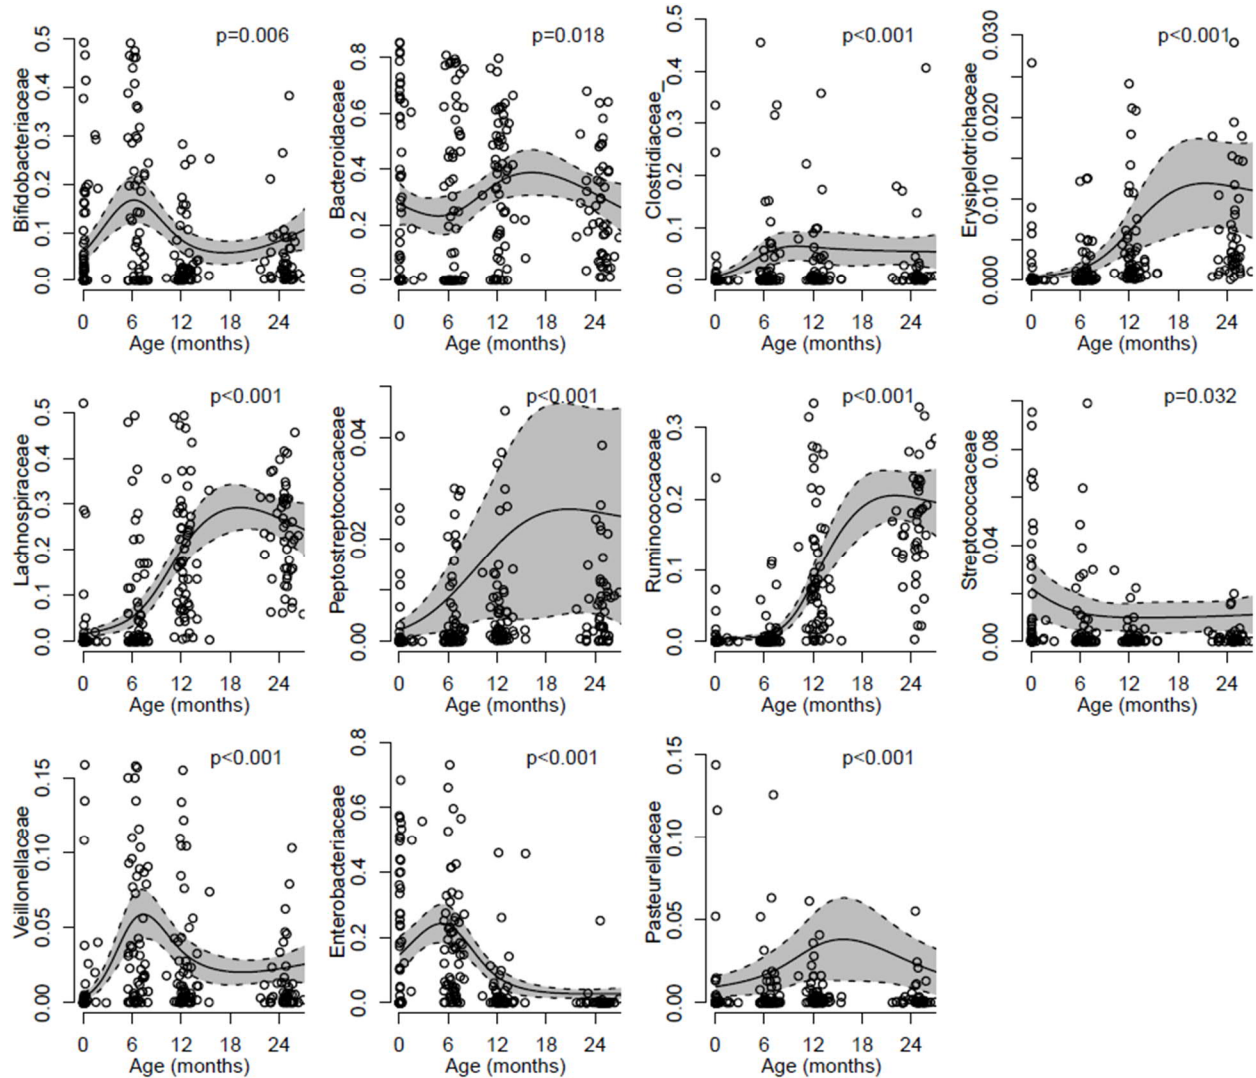

Supplementary Figure S5. Stacked bar chart of the relative distribution of operational taxonomic units (OTUs) and associated genera detected in the children's and mothers' gut microbiota. The 20 most abundant OTUs detected in the children's gut microbiota are depicted.

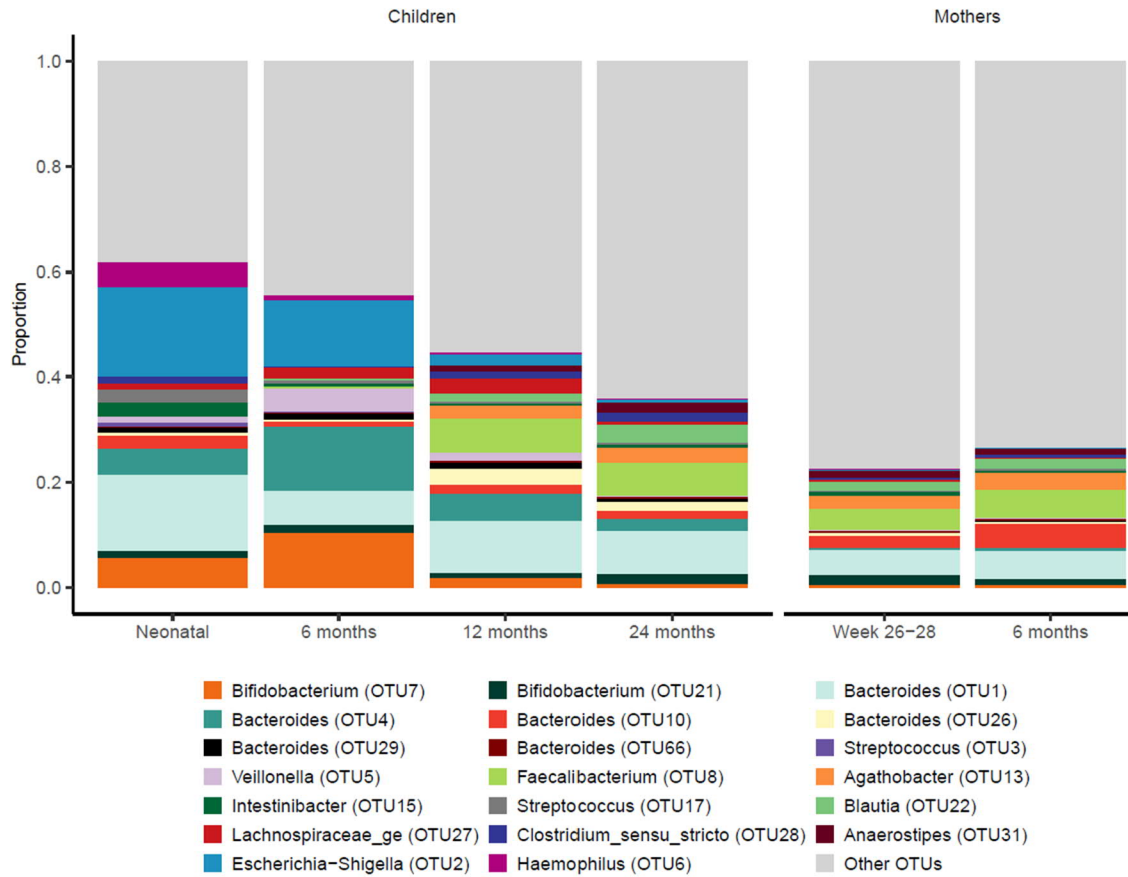

Supplementary Figure S6. Model-based predictions of relative abundance of operational taxonomic units (OTUs) in the gut of children plotted against age. Lines indicate mean values (solid) and 95% confidence intervals (dashed). The y-axis shows the relative abundance in proportion. Only observations < 97<sup>th</sup> percentile are shown.

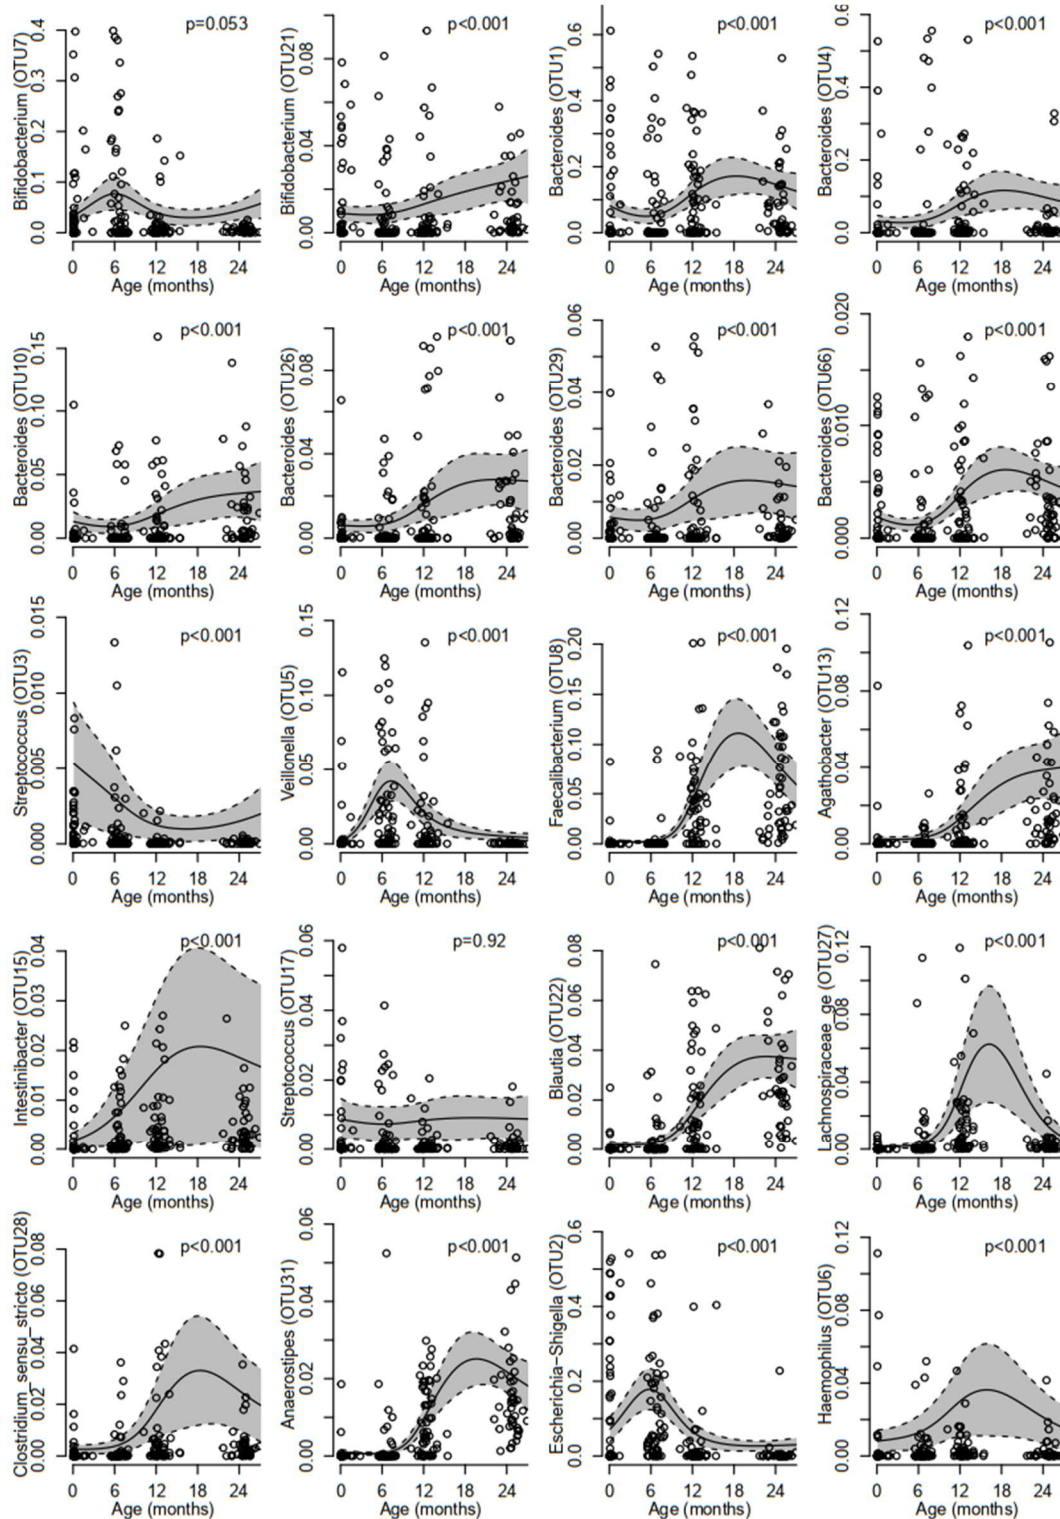

Supplementary Figure S7. Model-based predictions of relative abundance of the phylum Bacteroidetes in the gut of children plotted against age. Predictions are separated by the mothers' relative abundance of Bacteroidetes (at quartiles) at gestational week 26-28. Lines indicate mean values adjusted for potential confounders (see Table 1). All continuous adjustment variables are fixed at their median value and all categorical adjustment variables are fixed at their most common category. The y-axis shows the relative abundance in proportion.

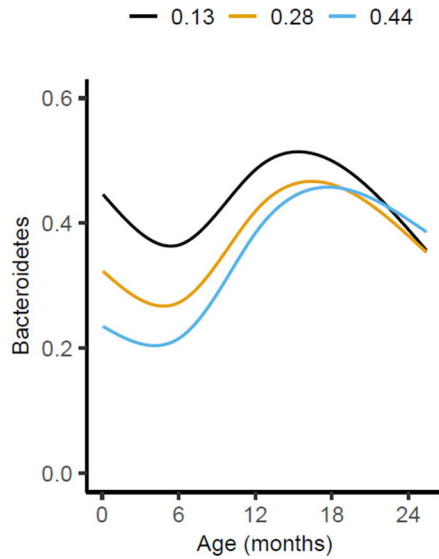



Supplementary Figure S8. Model-based predictions of relative abundance of Veillonella (operational taxonomic unit (OTU) 5) in the gut of children plotted against the mother's proportion of Veillonella (OTU5). Lines indicate mean values (solid) and 95% confidence intervals (dashed), adjusted for children's age and potential confounders (see Table 1). All continuous adjustment variables are fixed at their median value and all categorical adjustment variables are fixed at their most common category

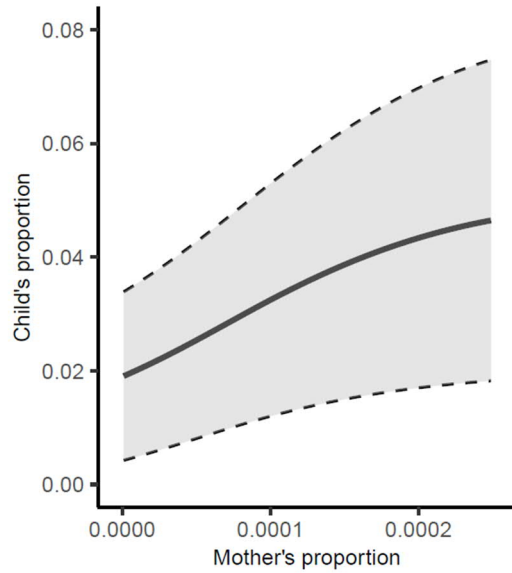



Supplementary Figure S9. Principal coordinate analysis plot (Bray-Curtis distances) with centroids (large symbols) depicting differences in overall gut microbiota composition across four time points, between children between vaginally- and caesarean-delivered children. M = month

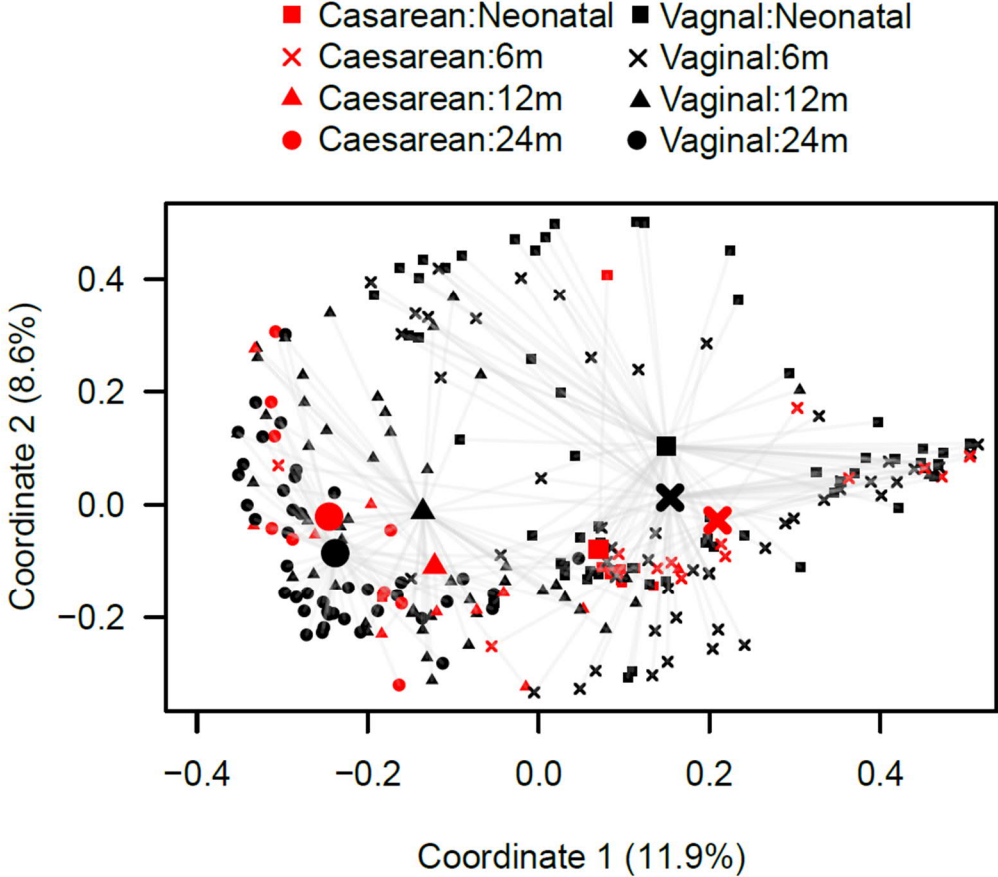

Supplementary Figure S10. Model-based predictions of relative abundance of the family Bacteroidaceae and Streptococcaceae in the gut of children by mode of delivery plotted against age. Lines indicate mean values (solid) and 95% confidence intervals (dashed), adjusted for potential confounders (see Table 1). P reflect for the interaction between mode of delivery and child age. All continuous adjustment variables are fixed at their median value and all categorical adjustment variables are fixed at their most common category. For Streptococcaceae are 3 observations > 99<sup>th</sup> percentile not shown.

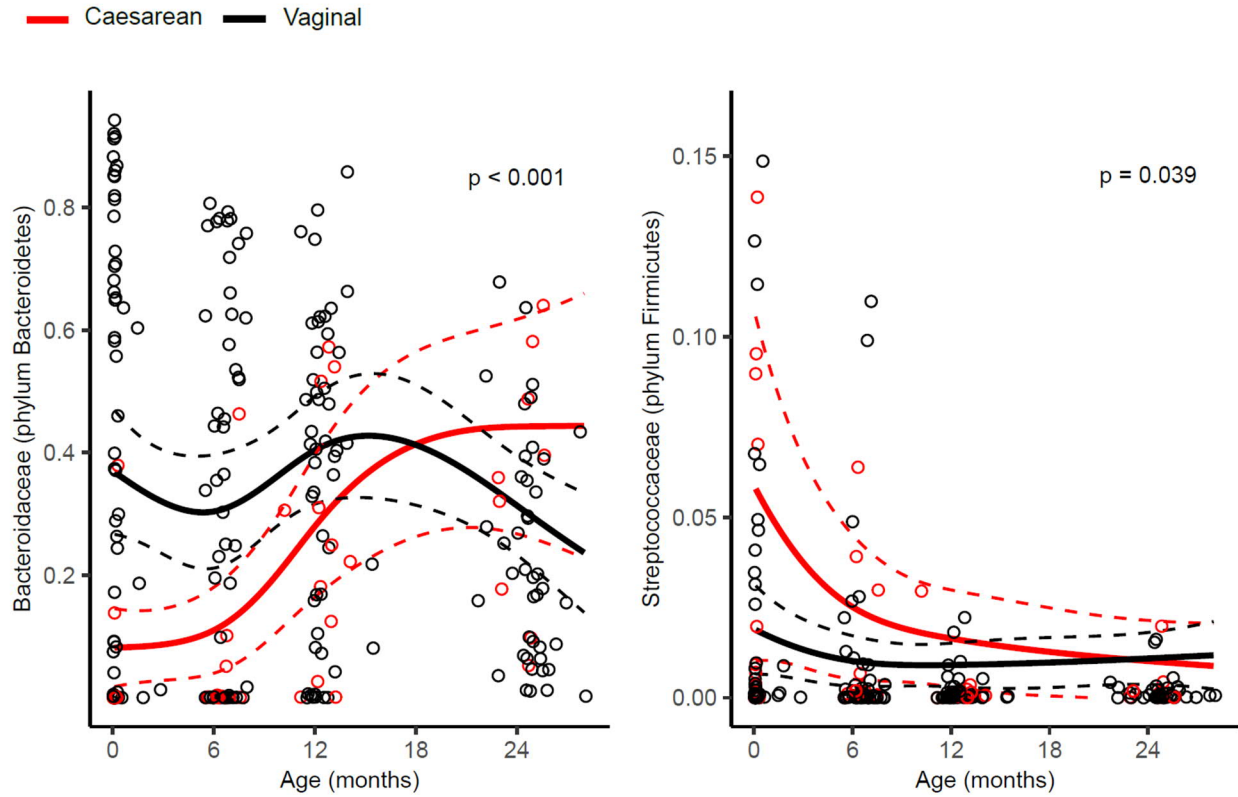

Supplementary Figure S11. Model-based predictions of relative abundance of the phylum Firmicutes and an operational taxonomic unit (OTU) belonging to the genus Streptococcus (OTU3) in the gut of children plotted against age. Predictions are separated by gestational age in days (at quartiles). Lines indicate mean values adjusted for potential confounders (see Table 1). All continuous adjustment variables are fixed at their median value and all categorical adjustment variables are fixed at their most common category. The y-axis shows the relative abundance in proportion.

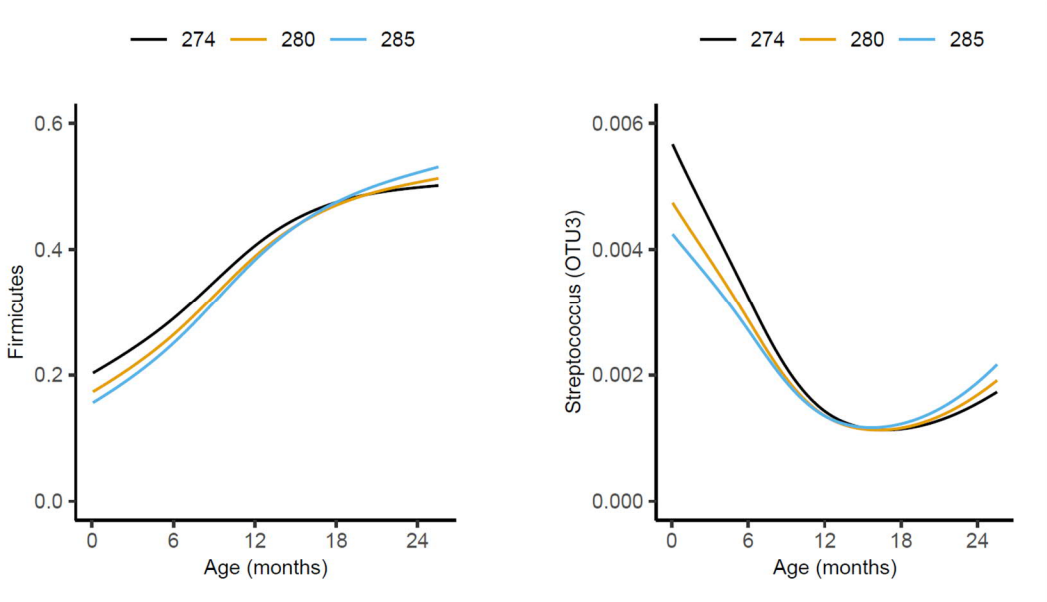

Supplementary Figure S12. Model-based prediction of relative abundance of operational taxonomic units (OTUs) belonging to the genus *Bacteroides* in the gut of children plotted against birth weight. Lines indicate mean values (solid) and 95% confidence intervals (dashed), adjusted for children's age and potential confounders (see Table 1). All continuous adjustment variables are fixed at their median value and all categorical adjustment variables are fixed at their most common category. The y-axis shows the relative abundance in proportion.

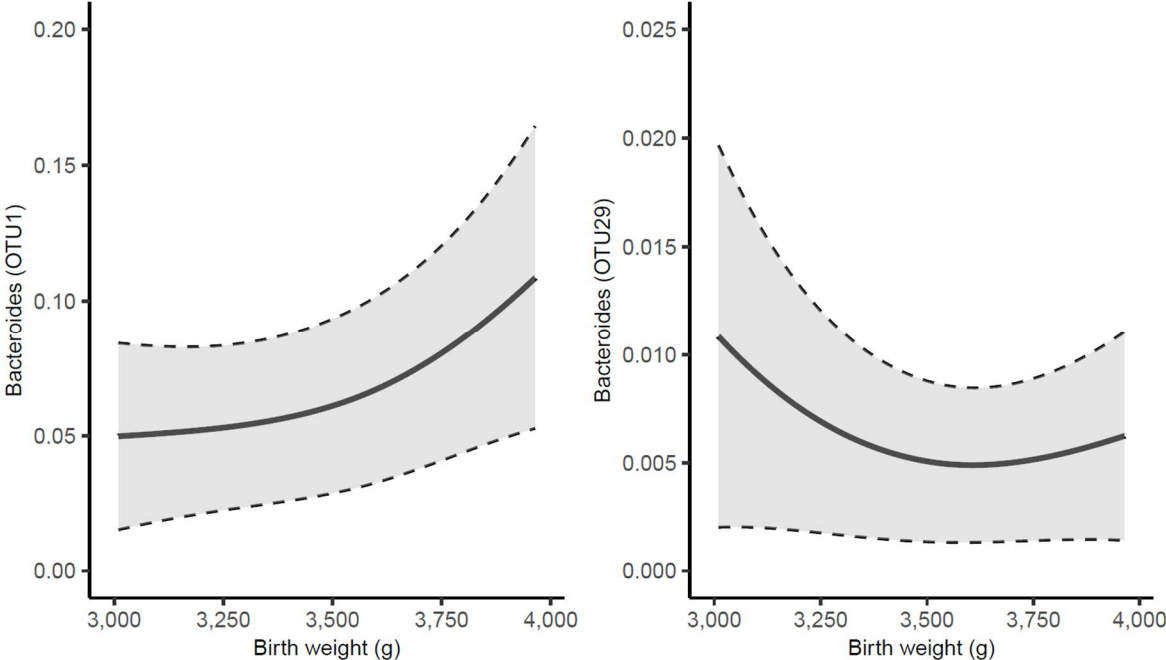

Supplementary Figure S13. Model-based prediction of relative abundance of the phylum Actinobacteria and an operational taxonomic unit (OTU) belonging to the genus Bifidobacterium (OTU21) in the gut of children by the presence of furry pets in the household, plotted against age. Lines indicate mean values (solid) and 95% confidence intervals (dashed), adjusted for potential confounders (see Table 1). All continuous adjustment variables are fixed at their median value and all categorical adjustment variables are fixed at their most common category. The y-axis shows the relative abundance in proportion. For Bifidobacterium (OTU21) five observations > 97<sup>th</sup> percentile are not shown.

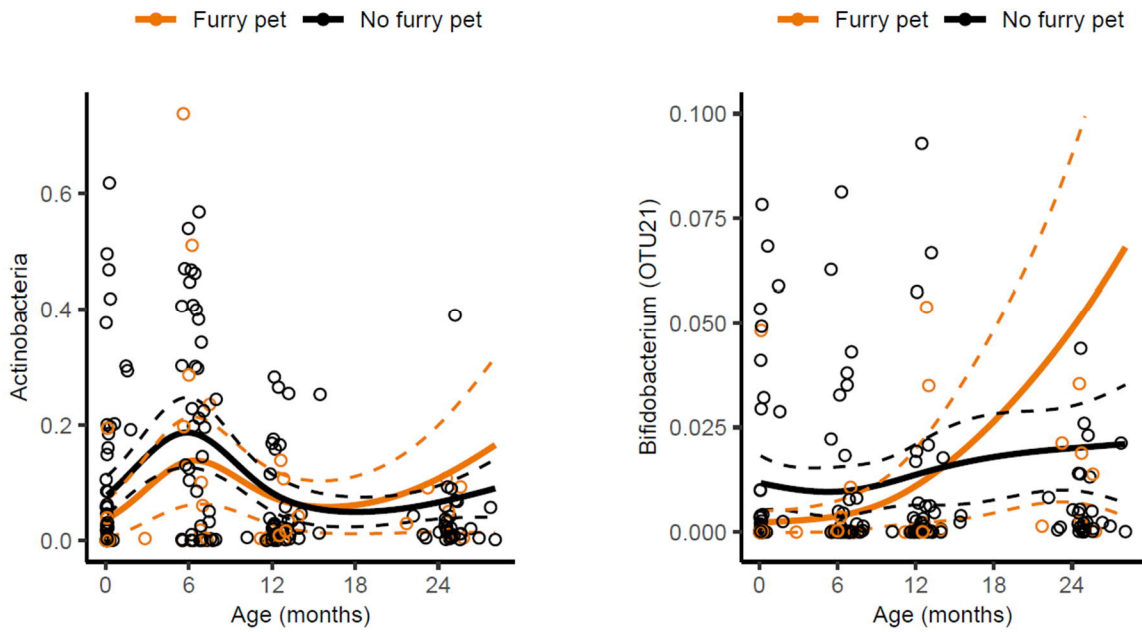

Supplementary Figure S14. Model-based prediction of relative abundance of the family Bifidobacteriaceae in the gut of children by the presence of furry pets in the household, plotted against age. Lines indicate mean values (solid) and 95% confidence intervals (dashed), adjusted for potential confounders (see Table 1). P reflect for the interaction between furry pet and child age. All continuous adjustment variables are fixed at their median value and all categorical adjustment variables are fixed at their most common category. The y-axis shows the relative abundance in proportion.

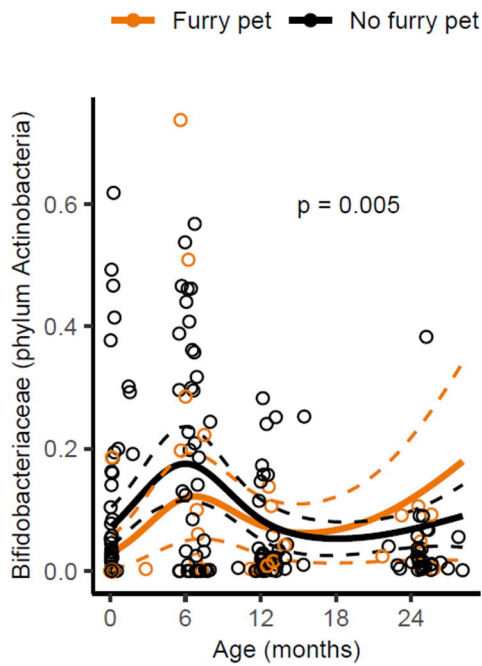

Supplementary Table S1. The 20 most common operational taxonomic units (OTUs) in the gut microbiota of children.

| Phylum         | Class               | Order             | Family                | Genus                       | OTU number |
|----------------|---------------------|-------------------|-----------------------|-----------------------------|------------|
| Actinobacteria | Actinobacteria      | Bifidobacteriales | Bifidobacteriaceae    | Bifidobacterium             | 7          |
| Actinobacteria | Actinobacteria      | Bifidobacteriales | Bifidobacteriaceae    | Bifidobacterium             | 21         |
| Bacteroidetes  | Bacteroidia         | Bacteroidales     | Bacteroidaceae        | Bacteroides                 | 1          |
| Bacteroidetes  | Bacteroidia         | Bacteroidales     | Bacteroidaceae        | Bacteroides                 | 4          |
| Bacteroidetes  | Bacteroidia         | Bacteroidales     | Bacteroidaceae        | Bacteroides                 | 10         |
| Bacteroidetes  | Bacteroidia         | Bacteroidales     | Bacteroidaceae        | Bacteroides                 | 26         |
| Bacteroidetes  | Bacteroidia         | Bacteroidales     | Bacteroidaceae        | Bacteroides                 | 29         |
| Bacteroidetes  | Bacteroidia         | Bacteroidales     | Bacteroidaceae        | Bacteroides                 | 66         |
| Firmicutes     | Bacilli             | Lactobacillales   | Streptococcaceae      | Streptococcus               | 3          |
| Firmicutes     | Bacilli             | Lactobacillales   | Streptococcaceae      | Streptococcus               | 17         |
| Firmicutes     | Clostridia          | Clostridiales     | Clostridiaceae_1      | Clostridium_sensu_stricto_1 | 28         |
| Firmicutes     | Clostridia          | Clostridiales     | Lachnospiraceae       | Agathobacter                | 13         |
| Firmicutes     | Clostridia          | Clostridiales     | Lachnospiraceae       | Anaerostipes                | 31         |
| Firmicutes     | Clostridia          | Clostridiales     | Lachnospiraceae       | Blautia                     | 22         |
| Firmicutes     | Clostridia          | Clostridiales     | Lachnospiraceae       | Lachnospiraceae_ge          | 27         |
| Firmicutes     | Clostridia          | Clostridiales     | Peptostreptococcaceae | Intestinibacter             | 15         |
| Firmicutes     | Clostridia          | Clostridiales     | Ruminococcaceae       | Faecalibacterium            | 8          |
| Firmicutes     | Negativicutes       | Selenomonadales   | Veillonellaceae       | Veillonella                 | 5          |
| Proteobacteria | Gammaproteobacteria | Enterobacteriales | Enterobacteriaceae    | Escherichia-Shigella        | 2          |
| Proteobacteria | Gammaproteobacteria | Pasteurellales    | Pasteurellaceae       | Haemophilus                 | 6          |



Supplementary Table S2. Results from ordinal regression analyses and PERMANOVA. The FDR cut-off corresponded to a nominal p of 0.0213. OTU: operational taxonomic unit, m: month, neo: neonatal and beta: beta diversity

| Exposure        | Outcome         | Phylum         | Genus                      | OTU number | p                   | Interaction with age |
|-----------------|-----------------|----------------|----------------------------|------------|---------------------|----------------------|
| Age             | Inverse Simpson |                |                            | .          | <.0001              |                      |
| Age             | Phyla           | Actinobacteria |                            | .          | 0.0049              |                      |
| Age             | OTU             | Actinobacteria | Bifidobacterium            | 7          | 0.0528              |                      |
| Age             | OTU             | Actinobacteria | Bifidobacterium            | 21         | <.0001              |                      |
| Age             | Phyla           | Bacteroidetes  |                            | .          | 0.0153              |                      |
| Age             | OTU             | Bacteroidetes  | Bacteroides                | 1          | <.0001              |                      |
| Age             | OTU             | Bacteroidetes  | Bacteroides                | 4          | <.0001              |                      |
| Age             | OTU             | Bacteroidetes  | Bacteroides                | 10         | <.0001              |                      |
| Age             | OTU             | Bacteroidetes  | Bacteroides                | 26         | <.0001              |                      |
| Age             | OTU             | Bacteroidetes  | Bacteroides                | 29         | <.0001              |                      |
| Age             | OTU             | Bacteroidetes  | Bacteroides                | 66         | <.0001              |                      |
| Age             | Phyla           | Firmicutes     |                            | .          | <.0001              |                      |
| Age             | OTU             | Firmicutes     | Streptococcus              | 3          | <.0001              |                      |
| Age             | OTU             | Firmicutes     | Veillonella                | 5          | <.0001              |                      |
| Age             | OTU             | Firmicutes     | Faecalibacterium           | 8          | <.0001              |                      |
| Age             | OTU             | Firmicutes     | Agathobacter               | 13         | <.0001              |                      |
| Age             | OTU             | Firmicutes     | Intestinibacter            | 15         | <.0001              |                      |
| Age             | OTU             | Firmicutes     | Streptococcus              | 17         | 0.9216              |                      |
| Age             | OTU             | Firmicutes     | Blautia                    | 22         | <.0001              |                      |
| Age             | OTU             | Firmicutes     | Lachnospiraceae_ge         | 27         | <.0001              |                      |
| Age             | OTU             | Firmicutes     | Clostridium_sensu_stricto_ | 28         | <.0001              |                      |
| Age             | OTU             | Firmicutes     | Anaerostipes               | 31         | <.0001              |                      |
| Age             | Phyla           | Proteobacteria |                            | .          | <.0001              |                      |
| Age             | OTU             | Proteobacteria | Escherichia-Shigella       | 2          | <.0001              |                      |
| Age             | OTU             | Proteobacteria | Haemophilus                | 6          | 0.0001              |                      |
| Maternal W26-28 | Inverse Simpson |                |                            | .          | 0.0849              | No                   |
| Maternal W26-28 | Phyla           | Actinobacteria |                            | .          | 0.2691              | No                   |
| Maternal W26-28 | OTU             | Actinobacteria | Bifidobacterium            | 7          | 0.0160 <sup>‡</sup> | Yes                  |
| Maternal W26-28 | OTU             | Actinobacteria | Bifidobacterium            | 21         | 0.0270              | Yes                  |
| Maternal W26-28 | Phyla           | Bacteroidetes  |                            | .          | 0.0056              | Yes                  |
| Maternal W26-28 | OTU             | Bacteroidetes  | Bacteroides                | 1          | 0.6707              | No                   |

| Exposure         | Outcome         | Phylum         | Genus                      | OTU number | p                   | Interaction with age |
|------------------|-----------------|----------------|----------------------------|------------|---------------------|----------------------|
| Maternal W26-28  | OTU             | Bacteroidetes  | Bacteroides                | 4          | 0.3301              | No                   |
| Maternal W26-28  | OTU             | Bacteroidetes  | Bacteroides                | 10         | 0.2625              | No                   |
| Maternal W26-28  | OTU             | Bacteroidetes  | Bacteroides                | 26         | 0.1274              | No                   |
| Maternal W26-28  | OTU             | Bacteroidetes  | Bacteroides                | 29         | 0.3754              | No                   |
| Maternal W26-28  | OTU             | Bacteroidetes  | Bacteroides                | 66         | 0.4180              | No                   |
| Maternal W26-28  | Phyla           | Firmicutes     |                            | .          | 0.3952              | No                   |
| Maternal W26-28  | OTU             | Firmicutes     | Streptococcus              | 3          | 0.1977              | No                   |
| Maternal W26-28  | OTU             | Firmicutes     | Veillonella                | 5          | 0.0012              | No                   |
| Maternal W26-28  | OTU             | Firmicutes     | Faecalibacterium           | 8          | 0.4082              | No                   |
| Maternal W26-28  | OTU             | Firmicutes     | Agathobacter               | 13         | 0.9336              | No                   |
| Maternal W26-28  | OTU             | Firmicutes     | Intestinibacter            | 15         | 0.1032              | No                   |
| Maternal W26-28  | OTU             | Firmicutes     | Streptococcus              | 17         | 0.0094 <sup>†</sup> | Yes                  |
| Maternal W26-28  | OTU             | Firmicutes     | Blautia                    | 22         | 0.8490              | No                   |
| Maternal W26-28  | OTU             | Firmicutes     | Lachnospiraceae_ge         | 27         | 0.0170 <sup>†</sup> | Yes                  |
| Maternal W26-28  | OTU             | Firmicutes     | Clostridium_sensu_stricto_ | 28         | 0.3917              | No                   |
| Maternal W26-28  | OTU             | Firmicutes     | Anaerostipes               | 31         | 0.3798              | No                   |
| Maternal W26-28  | Phyla           | Proteobacteria |                            | .          | 0.0258              | Yes                  |
| Maternal W26-28  | OTU             | Proteobacteria | Escherichia-Shigella       | 2          | 0.1577              | No                   |
| Maternal W26-28  | OTU             | Proteobacteria | Haemophilus                | 6          | 0.1968              | No                   |
| Mode of delivery | Beta Neo.       |                |                            | .          | 0.0065              |                      |
| Mode of delivery | Beta 6M         |                |                            | .          | 0.1269              |                      |
| Mode of delivery | Beta 12M        |                |                            | .          | 0.7686              |                      |
| Mode of delivery | Beta 24M        |                |                            | .          | 0.7246              |                      |
| Mode of delivery | Inverse Simpson |                |                            | .          | 0.4302              | No                   |
| Mode of delivery | Phyla           | Actinobacteria |                            | .          | 0.5895              | No                   |
| Mode of delivery | OTU             | Actinobacteria | Bifidobacterium            | 7          | 0.4765              | No                   |
| Mode of delivery | OTU             | Actinobacteria | Bifidobacterium            | 21         | 0.1357              | No                   |
| Mode of delivery | Phyla           | Bacteroidetes  |                            | .          | <.0001              | Yes                  |
| Mode of delivery | OTU             | Bacteroidetes  | Bacteroides                | 1          | 0.0151              | Yes                  |
| Mode of delivery | OTU             | Bacteroidetes  | Bacteroides                | 4          | 0.9487              | No                   |
| Mode of delivery | OTU             | Bacteroidetes  | Bacteroides                | 10         | 0.0372              | No                   |
| Mode of delivery | OTU             | Bacteroidetes  | Bacteroides                | 26         | 0.0331              | No                   |
| Mode of delivery | OTU             | Bacteroidetes  | Bacteroides                | 29         | 0.0085              | No                   |
| Mode of delivery | OTU             | Bacteroidetes  | Bacteroides                | 66         | 0.0062              | Yes                  |
| Mode of delivery | Phyla           | Firmicutes     |                            | .          | <.0001              | Yes                  |

| Exposure         | Outcome         | Phylum         | Genus                      | OTU number | p                   | Interaction with age |
|------------------|-----------------|----------------|----------------------------|------------|---------------------|----------------------|
| Mode of delivery | OTU             | Firmicutes     | Streptococcus              | 3          | 0.0162              | Yes                  |
| Mode of delivery | OTU             | Firmicutes     | Veillonella                | 5          | 0.0094              | No                   |
| Mode of delivery | OTU             | Firmicutes     | Faecalibacterium           | 8          | 0.0029              | No                   |
| Mode of delivery | OTU             | Firmicutes     | Agathobacter               | 13         | 0.7241              | No                   |
| Mode of delivery | OTU             | Firmicutes     | Intestinibacter            | 15         | 0.0713              | No                   |
| Mode of delivery | OTU             | Firmicutes     | Streptococcus              | 17         | 0.0164              | No                   |
| Mode of delivery | OTU             | Firmicutes     | Blautia                    | 22         | 0.4449              | No                   |
| Mode of delivery | OTU             | Firmicutes     | Lachnospiraceae_ge         | 27         | 0.0941              | No                   |
| Mode of delivery | OTU             | Firmicutes     | Clostridium_sensu_stricto_ | 28         | 0.9486              | No                   |
| Mode of delivery | OTU             | Firmicutes     | Anaerostipes               | 31         | 0.0144 <sup>‡</sup> | Yes                  |
| Mode of delivery | Phyla           | Proteobacteria |                            | .          | 0.2723              | No                   |
| Mode of delivery | OTU             | Proteobacteria | Escherichia-Shigella       | 2          | 0.0008              | Yes                  |
| Mode of delivery | OTU             | Proteobacteria | Haemophilus                | 6          | 0.2934              | No                   |
| Parity           | Beta Neo.       |                |                            | .          | 0.3748              |                      |
| Parity           | Beta 6M         |                |                            | .          | 0.5152              |                      |
| Parity           | Beta 12M        |                |                            | .          | 0.1744              |                      |
| Parity           | Beta 24M        |                |                            | .          | 0.1604              |                      |
| Parity           | Inverse Simpson |                |                            | .          | 0.1720              | No                   |
| Parity           | Phyla           | Actinobacteria |                            | .          | 0.1540              | No                   |
| Parity           | OTU             | Actinobacteria | Bifidobacterium            | 7          | 0.1880              | No                   |
| Parity           | OTU             | Actinobacteria | Bifidobacterium            | 21         | 0.0226              | No                   |
| Parity           | Phyla           | Bacteroidetes  |                            | .          | 0.9676              | No                   |
| Parity           | OTU             | Bacteroidetes  | Bacteroides                | 1          | 0.3157              | No                   |
| Parity           | OTU             | Bacteroidetes  | Bacteroides                | 4          | 0.0421              | Yes                  |
| Parity           | OTU             | Bacteroidetes  | Bacteroides                | 10         | 0.3514              | No                   |
| Parity           | OTU             | Bacteroidetes  | Bacteroides                | 26         | 0.0617              | No                   |
| Parity           | OTU             | Bacteroidetes  | Bacteroides                | 29         | 0.3496              | No                   |
| Parity           | OTU             | Bacteroidetes  | Bacteroides                | 66         | 0.8153              | No                   |
| Parity           | Phyla           | Firmicutes     |                            | .          | 0.9991              | No                   |
| Parity           | OTU             | Firmicutes     | Streptococcus              | 3          | 0.1621              | No                   |
| Parity           | OTU             | Firmicutes     | Veillonella                | 5          | 0.2491              | No                   |
| Parity           | OTU             | Firmicutes     | Faecalibacterium           | 8          | 0.5068              | No                   |
| Parity           | OTU             | Firmicutes     | Agathobacter               | 13         | 0.6753              | No                   |
| Parity           | OTU             | Firmicutes     | Intestinibacter            | 15         | 0.6297              | No                   |
| Parity           | OTU             | Firmicutes     | Streptococcus              | 17         | 0.0480              | Yes                  |

| Exposure        | Outcome         | Phylum         | Genus                      | OTU number | p                   | Interaction with age |
|-----------------|-----------------|----------------|----------------------------|------------|---------------------|----------------------|
| Parity          | OTU             | Firmicutes     | Blautia                    | 22         | 0.6606              | No                   |
| Parity          | OTU             | Firmicutes     | Lachnospiraceae_ge         | 27         | 0.8005              | No                   |
| Parity          | OTU             | Firmicutes     | Clostridium_sensu_stricto_ | 28         | 0.0322              | No                   |
| Parity          | OTU             | Firmicutes     | Anaerostipes               | 31         | 0.1825              | No                   |
| Parity          | Phyla           | Proteobacteria |                            | .          | 0.4039              | No                   |
| Parity          | OTU             | Proteobacteria | Escherichia-Shigella       | 2          | 0.8329              | No                   |
| Parity          | OTU             | Proteobacteria | Haemophilus                | 6          | 0.0046              | No                   |
| Gestational age | Beta Neo.       |                |                            | .          | 0.1354              |                      |
| Gestational age | Beta 6M         |                |                            | .          | 0.4838              |                      |
| Gestational age | Beta 12M        |                |                            | .          | 0.4383              |                      |
| Gestational age | Beta 24M        |                |                            | .          | 0.2539              |                      |
| Gestational age | Inverse Simpson |                |                            | .          | 0.8197              | No                   |
| Gestational age | Phyla           | Actinobacteria |                            | .          | 0.6981              | No                   |
| Gestational age | OTU             | Actinobacteria | Bifidobacterium            | 7          | 0.4557              | No                   |
| Gestational age | OTU             | Actinobacteria | Bifidobacterium            | 21         | 0.5600              | No                   |
| Gestational age | Phyla           | Bacteroidetes  |                            | .          | 0.0370              | Yes                  |
| Gestational age | OTU             | Bacteroidetes  | Bacteroides                | 1          | 0.1545              | No                   |
| Gestational age | OTU             | Bacteroidetes  | Bacteroides                | 4          | 0.1378              | No                   |
| Gestational age | OTU             | Bacteroidetes  | Bacteroides                | 10         | 0.9830              | No                   |
| Gestational age | OTU             | Bacteroidetes  | Bacteroides                | 26         | 0.6707              | No                   |
| Gestational age | OTU             | Bacteroidetes  | Bacteroides                | 29         | 0.5451              | No                   |
| Gestational age | OTU             | Bacteroidetes  | Bacteroides                | 66         | 0.1957              | No                   |
| Gestational age | Phyla           | Firmicutes     |                            | .          | 0.0158              | Yes                  |
| Gestational age | OTU             | Firmicutes     | Streptococcus              | 3          | 0.0213              | Yes                  |
| Gestational age | OTU             | Firmicutes     | Veillonella                | 5          | 0.1530              | No                   |
| Gestational age | OTU             | Firmicutes     | Faecalibacterium           | 8          | 0.6364              | No                   |
| Gestational age | OTU             | Firmicutes     | Agathobacter               | 13         | 0.1069              | No                   |
| Gestational age | OTU             | Firmicutes     | Intestinibacter            | 15         | 0.4131              | No                   |
| Gestational age | OTU             | Firmicutes     | Streptococcus              | 17         | 0.1368              | No                   |
| Gestational age | OTU             | Firmicutes     | Blautia                    | 22         | 0.1807              | No                   |
| Gestational age | OTU             | Firmicutes     | Lachnospiraceae_ge         | 27         | 0.0541              | No                   |
| Gestational age | OTU             | Firmicutes     | Clostridium_sensu_stricto_ | 28         | 0.0005 <sup>†</sup> | No                   |
| Gestational age | OTU             | Firmicutes     | Anaerostipes               | 31         | 0.1156              | No                   |
| Gestational age | Phyla           | Proteobacteria |                            | .          | 0.5605              | No                   |
| Gestational age | OTU             | Proteobacteria | Escherichia-Shigella       | 2          | 0.0004 <sup>†</sup> | Yes                  |

| Exposure               | Outcome         | Phylum         | Genus                      | OTU number | p                   | Interaction with age |
|------------------------|-----------------|----------------|----------------------------|------------|---------------------|----------------------|
| Gestational age        | OTU             | Proteobacteria | Haemophilus                | 6          | 0.2063              | No                   |
| Birth weight           | Beta Neo.       |                |                            | .          | 0.1744              |                      |
| Birth weight           | Beta 6M         |                |                            | .          | 0.6067              |                      |
| Birth weight           | Beta 12M        |                |                            | .          | 0.0200              |                      |
| Birth weight           | Beta 24M        |                |                            | .          | 0.9390              |                      |
| Birth weight           | Inverse Simpson |                |                            | .          | 0.8412              | No                   |
| Birth weight           | Phyla           | Actinobacteria |                            | .          | 0.6559              | No                   |
| Birth weight           | OTU             | Actinobacteria | Bifidobacterium            | 7          | 0.3328              | No                   |
| Birth weight           | OTU             | Actinobacteria | Bifidobacterium            | 21         | 0.6611              | No                   |
| Birth weight           | Phyla           | Bacteroidetes  |                            | .          | 0.5653              | No                   |
| Birth weight           | OTU             | Bacteroidetes  | Bacteroides                | 1          | 0.0070              | No                   |
| Birth weight           | OTU             | Bacteroidetes  | Bacteroides                | 4          | 0.8128              | No                   |
| Birth weight           | OTU             | Bacteroidetes  | Bacteroides                | 10         | 0.9301              | No                   |
| Birth weight           | OTU             | Bacteroidetes  | Bacteroides                | 26         | 0.2854              | No                   |
| Birth weight           | OTU             | Bacteroidetes  | Bacteroides                | 29         | 0.0130              | No                   |
| Birth weight           | OTU             | Bacteroidetes  | Bacteroides                | 66         | 0.0399              | No                   |
| Birth weight           | Phyla           | Firmicutes     |                            | .          | 0.8592              | No                   |
| Birth weight           | OTU             | Firmicutes     | Streptococcus              | 3          | 0.6983              | No                   |
| Birth weight           | OTU             | Firmicutes     | Veillonella                | 5          | 0.6706              | No                   |
| Birth weight           | OTU             | Firmicutes     | Faecalibacterium           | 8          | 0.7032              | No                   |
| Birth weight           | OTU             | Firmicutes     | Agathobacter               | 13         | 0.8801              | No                   |
| Birth weight           | OTU             | Firmicutes     | Intestinibacter            | 15         | 0.0515              | No                   |
| Birth weight           | OTU             | Firmicutes     | Streptococcus              | 17         | 0.2552              | No                   |
| Birth weight           | OTU             | Firmicutes     | Blautia                    | 22         | 0.0303              | Yes                  |
| Birth weight           | OTU             | Firmicutes     | Lachnospiraceae_ge         | 27         | 0.1898              | No                   |
| Birth weight           | OTU             | Firmicutes     | Clostridium_sensu_stricto_ | 28         | 0.7989              | No                   |
| Birth weight           | OTU             | Firmicutes     | Anaerostipes               | 31         | 0.7833              | No                   |
| Birth weight           | Phyla           | Proteobacteria |                            | .          | 0.1101              | No                   |
| Birth weight           | OTU             | Proteobacteria | Escherichia-Shigella       | 2          | 0.0036 <sup>†</sup> | Yes                  |
| Birth weight           | OTU             | Proteobacteria | Haemophilus                | 6          | 0.0405              | Yes                  |
| Antibiotics (prenatal) | Beta Neo.       |                |                            | .          | 0.1004              |                      |
| Antibiotics (prenatal) | Beta 6M         |                |                            | .          | 0.5602              |                      |
| Antibiotics (prenatal) | Beta 12M        |                |                            | .          | 0.1704              |                      |
| Antibiotics (prenatal) | Beta 24M        |                |                            | .          | 0.4723              |                      |
| Antibiotics (prenatal) | Inverse Simpson |                |                            | .          | 0.1508              | No                   |

| Exposure               | Outcome         | Phylum         | Genus                      | OTU number | p                   | Interaction with age |
|------------------------|-----------------|----------------|----------------------------|------------|---------------------|----------------------|
| Antibiotics (prenatal) | Phyla           | Actinobacteria |                            | .          | 0.7551              | No                   |
| Antibiotics (prenatal) | OTU             | Actinobacteria | Bifidobacterium            | 7          | 0.6820              | No                   |
| Antibiotics (prenatal) | OTU             | Actinobacteria | Bifidobacterium            | 21         | 0.8224              | No                   |
| Antibiotics (prenatal) | Phyla           | Bacteroidetes  |                            | .          | 0.9674              | No                   |
| Antibiotics (prenatal) | OTU             | Bacteroidetes  | Bacteroides                | 1          | 0.1125              | No                   |
| Antibiotics (prenatal) | OTU             | Bacteroidetes  | Bacteroides                | 4          | 0.8298              | No                   |
| Antibiotics (prenatal) | OTU             | Bacteroidetes  | Bacteroides                | 10         | 0.8690              | No                   |
| Antibiotics (prenatal) | OTU             | Bacteroidetes  | Bacteroides                | 26         | 0.9869              | No                   |
| Antibiotics (prenatal) | OTU             | Bacteroidetes  | Bacteroides                | 29         | 0.8684              | No                   |
| Antibiotics (prenatal) | OTU             | Bacteroidetes  | Bacteroides                | 66         | 0.4508              | No                   |
| Antibiotics (prenatal) | Phyla           | Firmicutes     |                            | .          | 0.1103              | No                   |
| Antibiotics (prenatal) | OTU             | Firmicutes     | Streptococcus              | 3          | 0.8583              | No                   |
| Antibiotics (prenatal) | OTU             | Firmicutes     | Veillonella                | 5          | 0.0910              | No                   |
| Antibiotics (prenatal) | OTU             | Firmicutes     | Faecalibacterium           | 8          | 0.0163 <sup>†</sup> | Yes                  |
| Antibiotics (prenatal) | OTU             | Firmicutes     | Agathobacter               | 13         | 0.1060              | No                   |
| Antibiotics (prenatal) | OTU             | Firmicutes     | Intestinibacter            | 15         | 0.1466              | No                   |
| Antibiotics (prenatal) | OTU             | Firmicutes     | Streptococcus              | 17         | 0.4135              | No                   |
| Antibiotics (prenatal) | OTU             | Firmicutes     | Blautia                    | 22         | 0.0161              | No                   |
| Antibiotics (prenatal) | OTU             | Firmicutes     | Lachnospiraceae_ge         | 27         | 0.5490              | No                   |
| Antibiotics (prenatal) | OTU             | Firmicutes     | Clostridium_sensu_stricto_ | 28         | 0.3949              | No                   |
| Antibiotics (prenatal) | OTU             | Firmicutes     | Anaerostipes               | 31         | 0.0700              | No                   |
| Antibiotics (prenatal) | Phyla           | Proteobacteria |                            | .          | 0.1111              | No                   |
| Antibiotics (prenatal) | OTU             | Proteobacteria | Escherichia-Shigella       | 2          | 0.0467              | Yes                  |
| Antibiotics (prenatal) | OTU             | Proteobacteria | Haemophilus                | 6          | 0.9159              | No                   |
| Antibiotics (ever-use) | Beta 24M        |                |                            | .          | 0.3503              |                      |
| Antibiotics (ever-use) | Inverse Simpson |                |                            | .          | 0.8050              |                      |
| Antibiotics (ever-use) | Phyla           | Actinobacteria |                            | .          | 0.4060              |                      |
| Antibiotics (ever-use) | OTU             | Actinobacteria | Bifidobacterium            | 7          | 0.5908              |                      |
| Antibiotics (ever-use) | OTU             | Actinobacteria | Bifidobacterium            | 21         | 0.4960              |                      |
| Antibiotics (ever-use) | Phyla           | Bacteroidetes  |                            | .          | 0.5604              |                      |
| Antibiotics (ever-use) | OTU             | Bacteroidetes  | Bacteroides                | 1          | 0.1678              |                      |
| Antibiotics (ever-use) | OTU             | Bacteroidetes  | Bacteroides                | 4          | 0.6575              |                      |
| Antibiotics (ever-use) | OTU             | Bacteroidetes  | Bacteroides                | 10         | 0.2769              |                      |
| Antibiotics (ever-use) | OTU             | Bacteroidetes  | Bacteroides                | 26         | 0.2141              |                      |
| Antibiotics (ever-use) | OTU             | Bacteroidetes  | Bacteroides                | 29         | 0.1673              |                      |

| Exposure               | Outcome         | Phylum         | Genus                      | OTU number | p                   | Interaction with age |
|------------------------|-----------------|----------------|----------------------------|------------|---------------------|----------------------|
| Antibiotics (ever-use) | OTU             | Bacteroidetes  | Bacteroides                | 66         | 0.8326              |                      |
| Antibiotics (ever-use) | Phyla           | Firmicutes     |                            | .          | 0.9138              |                      |
| Antibiotics (ever-use) | OTU             | Firmicutes     | Streptococcus              | 3          | 0.1281              |                      |
| Antibiotics (ever-use) | OTU             | Firmicutes     | Veillonella                | 5          | 0.2359              |                      |
| Antibiotics (ever-use) | OTU             | Firmicutes     | Faecalibacterium           | 8          | 0.7881              |                      |
| Antibiotics (ever-use) | OTU             | Firmicutes     | Agathobacter               | 13         | 0.0212 <sup>†</sup> |                      |
| Antibiotics (ever-use) | OTU             | Firmicutes     | Intestinibacter            | 15         | 0.9617              |                      |
| Antibiotics (ever-use) | OTU             | Firmicutes     | Streptococcus              | 17         | 0.8970              |                      |
| Antibiotics (ever-use) | OTU             | Firmicutes     | Blautia                    | 22         | 0.7991              |                      |
| Antibiotics (ever-use) | OTU             | Firmicutes     | Lachnospiraceae_ge         | 27         | 0.8822              |                      |
| Antibiotics (ever-use) | OTU             | Firmicutes     | Clostridium_sensu_stricto_ | 28         | 0.3475              |                      |
| Antibiotics (ever-use) | OTU             | Firmicutes     | Anaerostipes               | 31         | 0.9381              |                      |
| Antibiotics (ever-use) | Phyla           | Proteobacteria |                            | .          | 0.7159              |                      |
| Antibiotics (ever-use) | OTU             | Proteobacteria | Escherichia-Shigella       | 2          | 0.1865              |                      |
| Antibiotics (ever-use) | OTU             | Proteobacteria | Haemophilus                | 6          | 0.1429              |                      |
| Furry pet              | Beta Neo.       |                |                            | .          | 0.7776              |                      |
| Furry pet              | Beta 6M         |                |                            | .          | 0.7816              |                      |
| Furry pet              | Beta 12M        |                |                            | .          | 0.7651              |                      |
| Furry pet              | Beta 24M        |                |                            | .          | 0.6677              |                      |
| Furry pet              | Inverse Simpson |                |                            | .          | 0.6015              | No                   |
| Furry pet              | Phyla           | Actinobacteria |                            | .          | 0.0120              | Yes                  |
| Furry pet              | OTU             | Actinobacteria | Bifidobacterium            | 7          | 0.0421              | Yes                  |
| Furry pet              | OTU             | Actinobacteria | Bifidobacterium            | 21         | 0.0003              | Yes                  |
| Furry pet              | Phyla           | Bacteroidetes  |                            | .          | 0.0904              | No                   |
| Furry pet              | OTU             | Bacteroidetes  | Bacteroides                | 1          | 0.9471              | No                   |
| Furry pet              | OTU             | Bacteroidetes  | Bacteroides                | 4          | 0.8425              | No                   |
| Furry pet              | OTU             | Bacteroidetes  | Bacteroides                | 10         | 0.0937              | No                   |
| Furry pet              | OTU             | Bacteroidetes  | Bacteroides                | 26         | 0.4678              | No                   |
| Furry pet              | OTU             | Bacteroidetes  | Bacteroides                | 29         | 0.8140              | No                   |
| Furry pet              | OTU             | Bacteroidetes  | Bacteroides                | 66         | 0.6792              | No                   |
| Furry pet              | Phyla           | Firmicutes     |                            | .          | 0.2571              | No                   |
| Furry pet              | OTU             | Firmicutes     | Streptococcus              | 3          | 0.7621              | No                   |
| Furry pet              | OTU             | Firmicutes     | Veillonella                | 5          | 0.7193              | No                   |
| Furry pet              | OTU             | Firmicutes     | Faecalibacterium           | 8          | 0.7408              | No                   |
| Furry pet              | OTU             | Firmicutes     | Agathobacter               | 13         | 0.0243              | Yes                  |



| Exposure  | Outcome | Phylum         | Genus                      | OTU number | p      | Interaction with age |
|-----------|---------|----------------|----------------------------|------------|--------|----------------------|
| Furry pet | OTU     | Firmicutes     | Intestinibacter            | 15         | 0.3986 | No                   |
| Furry pet | OTU     | Firmicutes     | Streptococcus              | 17         | 0.7647 | No                   |
| Furry pet | OTU     | Firmicutes     | Blautia                    | 22         | 0.9556 | No                   |
| Furry pet | OTU     | Firmicutes     | Lachnospiraceae_ge         | 27         | 0.8911 | No                   |
| Furry pet | OTU     | Firmicutes     | Clostridium_sensu_stricto_ | 28         | 0.8895 | No                   |
| Furry pet | OTU     | Firmicutes     | Anaerostipes               | 31         | 0.3786 | No                   |
| Furry pet | Phyla   | Proteobacteria |                            | .          | 0.6914 | No                   |
| Furry pet | OTU     | Proteobacteria | Escherichia-Shigella       | 2          | 0.8273 | No                   |
| Furry pet | OTU     | Proteobacteria | Haemophilus                | 6          | 0.7455 | No                   |

†Exclusion of one influential observation yielded a  $p > 0.05$ .

Supplementary Table S3. Comparison of microbiota composition based on Bray-Curtis and Jaccard distances. The shorter the distance between any pair of comparisons indicate greater similarity between microbial communities collected at those times. Comparisons of gut microbiota at different sampling times, where distances between different sampling points within the same child/mother (self), and distances between unrelated children (non-self) and between unrelated mothers (non-self) are presented. The Bray-Curtis distances are also depicted in Figure 3a. W = gestational week, m = month and CI Confidence Interval.

|        |                      |          | <b>Bray-Curtis<br/>Mean (95% CI)</b> | <b>Jaccard<br/>Mean (95% CI)</b> |
|--------|----------------------|----------|--------------------------------------|----------------------------------|
| Child  | Neonatal vs Neonatal | Non-self | 0.887 (0.872-0.902)                  | 0.947 (0.943-0.951)              |
| Child  | Neonatal vs 6m       | Non-self | 0.894 (0.880-0.909)                  | 0.956 (0.953-0.960)              |
| Child  | Neonatal vs 6m       | Self     | 0.846 (0.802-0.891)                  | 0.932 (0.919-0.945)              |
| Child  | Neonatal vs 12m      | Non-self | 0.933 (0.920-0.946)                  | 0.968 (0.964-0.972)              |
| Child  | Neonatal vs 12m      | Self     | 0.910 (0.870-0.949)                  | 0.961 (0.952-0.970)              |
| Child  | Neonatal vs 24m      | Non-self | 0.948 (0.935-0.960)                  | 0.974 (0.969-0.979)              |
| Child  | Neonatal vs 24m      | Self     | 0.942 (0.914-0.971)                  | 0.974 (0.968-0.980)              |
| Child  | 6m vs 6m             | Non-self | 0.841 (0.828-0.854)                  | 0.921 (0.916-0.927)              |
| Child  | 6m vs 12m            | Non-self | 0.908 (0.895-0.920)                  | 0.948 (0.944-0.953)              |
| Child  | 6m vs 12m            | Self     | 0.832 (0.794-0.869)                  | 0.920 (0.907-0.933)              |
| Child  | 6m vs 24m            | Non-self | 0.935 (0.920-0.949)                  | 0.966 (0.961-0.972)              |
| Child  | 6m vs 24m            | Self     | 0.918 (0.894-0.942)                  | 0.959 (0.952-0.967)              |
| Child  | 12m vs 12m           | Non-self | 0.840 (0.827-0.853)                  | 0.916 (0.913-0.919)              |
| Child  | 12m vs 24m           | Non-self | 0.831 (0.812-0.849)                  | 0.918 (0.910-0.925)              |
| Child  | 12m vs 24m           | Self     | 0.754 (0.710-0.797)                  | 0.887 (0.873-0.901)              |
| Child  | 24m vs 24m           | Non-self | 0.768 (0.754-0.783)                  | 0.885 (0.880-0.889)              |
| Mother | W26-28 vs W26-28     | Non-self | 0.756 (0.742-0.771)                  | 0.873 (0.868-0.878)              |
| Mother | W26-28 vs 6m         | Non-self | 0.759 (0.745-0.773)                  | 0.876 (0.872-0.881)              |
| Mother | W26-28 vs 6m         | Self     | 0.607 (0.572-0.642)                  | 0.802 (0.787-0.817)              |
| Mother | 6m vs 6m             | Non-self | 0.758 (0.744-0.771)                  | 0.878 (0.873-0.882)              |

Supplementary Table S4. Comparison of microbiota composition based on Bray-Curtis and Jaccard distances. The shorter the distance between any pair of comparisons indicate greater similarity between microbial communities collected at those times. Comparisons between gut and oral microbiota, and between children and their mothers and unrelated mothers. The distance between child and mother is based on the maternal sample at gestational week. The Bray-Curtis distances are also depicted in Figure 3b. W = gestational week, m = month and CI Confidence Interval.

|                                 |          | <b>Bray-Curtis<br/>Mean (95% CI)</b> | <b>Jaccard<br/>Mean (95% CI)</b> |
|---------------------------------|----------|--------------------------------------|----------------------------------|
| Gut: child vs mother            | Birth    | 0.955 (0.937-0.974)                  | 0.976 (0.970-0.982)              |
| Gut: child vs mother            | 6m       | 0.950 (0.933-0.968)                  | 0.973 (0.967-0.978)              |
| Gut: child vs mother            | 12m      | 0.862 (0.836-0.888)                  | 0.934 (0.925-0.943)              |
| Gut: child vs mother            | 24m      | 0.769 (0.741-0.797)                  | 0.887 (0.878-0.897)              |
| Gut: child vs unrelated mother  | Neonatal | 0.963 (0.953-0.973)                  | 0.977 (0.972-0.982)              |
| Gut: child vs unrelated mother  | 6m       | 0.953 (0.941-0.965)                  | 0.972 (0.967-0.978)              |
| Gut: child vs unrelated mother  | 12m      | 0.869 (0.852-0.885)                  | 0.935 (0.928-0.942)              |
| Gut: child vs unrelated mother  | 24m      | 0.793 (0.779-0.806)                  | 0.896 (0.890-0.901)              |
| Oral: child vs mother           | 6m       | 0.682 (0.636-0.729)                  | 0.880 (0.865-0.895)              |
| Oral: child vs mother           | 12m      | 0.644 (0.592-0.696)                  | 0.845 (0.827-0.863)              |
| Oral: child vs mother           | 24m      | 0.639 (0.587-0.691)                  | 0.832 (0.814-0.850)              |
| Oral: child vs unrelated mother | 6m       | 0.687 (0.658-0.716)                  | 0.883 (0.872-0.894)              |
| Oral: child vs unrelated mother | 12m      | 0.671 (0.629-0.713)                  | 0.852 (0.837-0.868)              |
| Oral: child vs unrelated mother | 24m      | 0.665 (0.626-0.705)                  | 0.838 (0.824-0.852)              |
| Child: gut vs oral (self)       | 6m       | 0.954 (0.932-0.977)                  | 0.975 (0.969-0.980)              |
| Child: gut vs oral (self)       | 12m      | 0.987 (0.981-0.994)                  | 0.990 (0.988-0.992)              |
| Child: gut vs oral (self)       | 24m      | 0.996 (0.994-0.998)                  | 0.993 (0.991-0.995)              |
| Child: gut vs oral (non-self)   | 6m       | 0.963 (0.954-0.972)                  | 0.979 (0.975-0.982)              |
| Child: gut vs oral (non-self)   | 12m      | 0.987 (0.983-0.991)                  | 0.990 (0.989-0.992)              |
| Child: gut vs oral (non-self)   | 24m      | 0.996 (0.994-0.997)                  | 0.993 (0.992-0.994)              |
| Mother: gut vs oral (self)      | W26-28   | 0.994 (0.991-0.997)                  | 0.995 (0.993-0.996)              |
| Mother: gut vs oral (non-self)  | W26-28   | 0.994 (0.992-0.997)                  | 0.995 (0.994-0.995)              |



|            |                  |          | Child      |            |            |            | Mother           |              |              |          |
|------------|------------------|----------|------------|------------|------------|------------|------------------|--------------|--------------|----------|
|            |                  |          | 12m vs 12m | 12m vs 24m | 12m vs 24m | 24m vs 24m | W26-28 vs W26-28 | W26-28 vs 6m | W26-28 vs 6m | 6m vs 6m |
|            |                  |          | Non-self   | Non-self   | Self       | Non-self   | Non-self         | Non-self     | Self         | Non-self |
| Child      | Neo vs Neo       | Non-self | <0.001     | <0.001     | <0.001     | <0.001     | <0.001           | <0.001       | <0.001       | <0.001   |
|            | Neo vs 6m        | Non-self | <0.001     | <0.001     | <0.001     | <0.001     | <0.001           | <0.001       | <0.001       | <0.001   |
|            | Neo vs 6m        | Self     | 0.798      | 0.517      | 0.004      | 0.001      | <0.001           | <0.001       | <0.001       | <0.001   |
|            | Neo vs 12m       | Non-self | <0.001     | <0.001     | <0.001     | <0.001     | <0.001           | <0.001       | <0.001       | <0.001   |
|            | Neo vs 12m       | Self     | 0.001      | <0.001     | <0.001     | <0.001     | <0.001           | <0.001       | <0.001       | <0.001   |
|            | Neo vs 24m       | Non-self | <0.001     | <0.001     | <0.001     | <0.001     | <0.001           | <0.001       | <0.001       | <0.001   |
|            | Neo vs 24m       | Self     | <0.001     | <0.001     | <0.001     | <0.001     | <0.001           | <0.001       | <0.001       | <0.001   |
|            | 6m vs 6m         | Non-self | 0.955      | 0.367      | <0.001     | <0.001     | <0.001           | <0.001       | <0.001       | <0.001   |
|            | 6m vs 12m        | Non-self | <0.001     | <0.001     | <0.001     | <0.001     | <0.001           | <0.001       | <0.001       | <0.001   |
|            | 6m vs 12m        | Self     | 0.660      | 0.958      | 0.007      | 0.002      | <0.001           | <0.001       | <0.001       | <0.001   |
|            | 6m vs 24m        | Non-self | <0.001     | <0.001     | <0.001     | <0.001     | <0.001           | <0.001       | <0.001       | <0.001   |
|            | 6m vs 24m        | Self     | <0.001     | <0.001     | <0.001     | <0.001     | <0.001           | <0.001       | <0.001       | <0.001   |
|            | 12m vs 12m       | Non-self |            | 0.391      | <0.001     | <0.001     | <0.001           | <0.001       | <0.001       | <0.001   |
|            | 12m vs 24m       | Non-self | 0.391      |            | 0.002      | <0.001     | <0.001           | <0.001       | <0.001       | <0.001   |
|            | 12m vs 24m       | Self     | <0.001     | 0.002      |            | 0.516      | 0.907            | 0.808        | <0.001       | 0.860    |
| 24m vs 24m | Non-self         | <0.001   | <0.001     | 0.516      |            | 0.232      | 0.355            | <0.001       | 0.274        |          |
| Mother     | W26-28 vs W26-28 | Non-self | <0.001     | <0.001     | 0.907      | 0.232      |                  | 0.776        | <0.001       | 0.893    |
|            | W26-28 vs 6m     | Non-self | <0.001     | <0.001     | 0.808      | 0.355      | 0.776            |              | <0.001       | 0.876    |
|            | W26-28 vs 6m     | Self     | <0.001     | <0.001     | <0.001     | <0.001     | <0.001           | <0.001       |              | <0.001   |
|            | 6m vs 6m         | Non-self | <0.001     | <0.001     | 0.860      | 0.274      | 0.893            | 0.876        | <0.001       |          |







|                                 |          | Child:<br>gut vs oral (self) |        |        | Child:<br>gut vs oral (non-self) |        |        | Mother:<br>gut vs oral (self) | Mother:<br>gut vs oral (non-self) |
|---------------------------------|----------|------------------------------|--------|--------|----------------------------------|--------|--------|-------------------------------|-----------------------------------|
|                                 |          | 6m                           | 12m    | 24m    | 6m                               | 12m    | 24m    | W26-28                        | W26-28                            |
| Gut: child vs mother            | Neonatal | 0.492                        | 0.003  | <0.001 | 0.460                            | 0.002  | <0.001 | <0.001                        | <0.001                            |
|                                 | 6m       | 0.254                        | 0.001  | <0.001 | 0.226                            | <0.001 | <0.001 | <0.001                        | <0.001                            |
|                                 | 12m      | <0.001                       | <0.001 | <0.001 | <0.001                           | <0.001 | <0.001 | <0.001                        | <0.001                            |
|                                 | 24m      | <0.001                       | <0.001 | <0.001 | <0.001                           | <0.001 | <0.001 | <0.001                        | <0.001                            |
| Gut: child vs unrelated mother  | Neonatal | 0.918                        | 0.001  | <0.001 | 0.943                            | <0.001 | <0.001 | <0.001                        | <0.001                            |
|                                 | 6m       | 0.235                        | <0.001 | <0.001 | 0.193                            | <0.001 | <0.001 | <0.001                        | <0.001                            |
|                                 | 12m      | <0.001                       | <0.001 | <0.001 | <0.001                           | <0.001 | <0.001 | <0.001                        | <0.001                            |
|                                 | 24m      | <0.001                       | <0.001 | <0.001 | <0.001                           | <0.001 | <0.001 | <0.001                        | <0.001                            |
| Oral: child vs mother           | 6m       | <0.001                       | <0.001 | <0.001 | <0.001                           | <0.001 | <0.001 | <0.001                        | <0.001                            |
|                                 | 12m      | <0.001                       | <0.001 | <0.001 | <0.001                           | <0.001 | <0.001 | <0.001                        | <0.001                            |
|                                 | 24m      | <0.001                       | <0.001 | <0.001 | <0.001                           | <0.001 | <0.001 | <0.001                        | <0.001                            |
| Oral: child vs unrelated mother | 6m       | <0.001                       | <0.001 | <0.001 | <0.001                           | <0.001 | <0.001 | <0.001                        | <0.001                            |
|                                 | 12m      | <0.001                       | <0.001 | <0.001 | <0.001                           | <0.001 | <0.001 | <0.001                        | <0.001                            |
|                                 | 24m      | <0.001                       | <0.001 | <0.001 | <0.001                           | <0.001 | <0.001 | <0.001                        | <0.001                            |
| Child: gut vs oral (self)       | 6m       |                              | 0.001  | <0.001 | 0.971                            | <0.001 | <0.001 | <0.001                        | <0.001                            |
|                                 | 12m      | 0.001                        |        | 0.013  | <0.001                           | 0.947  | 0.020  | 0.044                         | 0.033                             |
|                                 | 24m      | <0.001                       | 0.013  |        | <0.001                           | <0.001 | 0.617  | 0.368                         | 0.326                             |
| Child: gut vs oral (non-self)   | 6m       | 0.971                        | <0.001 | <0.001 |                                  | <0.001 | <0.001 | <0.001                        | <0.001                            |
|                                 | 12m      | <0.001                       | 0.947  | <0.001 | <0.001                           |        | <0.001 | 0.002                         | 0.001                             |
|                                 | 24m      | <0.001                       | 0.020  | 0.617  | <0.001                           | <0.001 |        | 0.595                         | 0.607                             |
| Mother: gut vs oral (self)      | W26-28   | <0.001                       | 0.044  | 0.368  | <0.001                           | 0.002  | 0.595  |                               | 0.905                             |
| Mother: gut vs oral (non-self)  | W26-28   | <0.001                       | 0.033  | 0.326  | <0.001                           | 0.001  | 0.607  | 0.905                         |                                   |



|            |                  |          | Child      |            |            |            | Mother           |              |              |          |
|------------|------------------|----------|------------|------------|------------|------------|------------------|--------------|--------------|----------|
|            |                  |          | 12m vs 12m | 12m vs 24m | 12m vs 24m | 24m vs 24m | W26-28 vs W26-28 | W26-28 vs 6m | W26-28 vs 6m | 6m vs 6m |
|            |                  |          | Non-self   | Non-self   | Self       | Non-self   | Non-self         | Non-self     | Self         | Non-self |
| Child      | Neo vs Neo       | Non-self | <0.001     | <0.001     | <0.001     | <0.001     | <0.001           | <0.001       | <0.001       | <0.001   |
|            | Neo vs 6m        | Non-self | <0.001     | <0.001     | <0.001     | <0.001     | <0.001           | <0.001       | <0.001       | <0.001   |
|            | Neo vs 6m        | Self     | 0.020      | 0.063      | <0.001     | <0.001     | <0.001           | <0.001       | <0.001       | <0.001   |
|            | Neo vs 12m       | Non-self | <0.001     | <0.001     | <0.001     | <0.001     | <0.001           | <0.001       | <0.001       | <0.001   |
|            | Neo vs 12m       | Self     | <0.001     | <0.001     | <0.001     | <0.001     | <0.001           | <0.001       | <0.001       | <0.001   |
|            | Neo vs 24m       | Non-self | <0.001     | <0.001     | <0.001     | <0.001     | <0.001           | <0.001       | <0.001       | <0.001   |
|            | Neo vs 24m       | Self     | <0.001     | <0.001     | <0.001     | <0.001     | <0.001           | <0.001       | <0.001       | <0.001   |
|            | 6m vs 6m         | Non-self | 0.074      | 0.428      | <0.001     | <0.001     | <0.001           | <0.001       | <0.001       | <0.001   |
|            | 6m vs 12m        | Non-self | <0.001     | <0.001     | <0.001     | <0.001     | <0.001           | <0.001       | <0.001       | <0.001   |
|            | 6m vs 12m        | Self     | 0.528      | 0.755      | 0.001      | <0.001     | <0.001           | <0.001       | <0.001       | <0.001   |
|            | 6m vs 24m        | Non-self | <0.001     | <0.001     | <0.001     | <0.001     | <0.001           | <0.001       | <0.001       | <0.001   |
|            | 6m vs 24m        | Self     | <0.001     | <0.001     | <0.001     | <0.001     | <0.001           | <0.001       | <0.001       | <0.001   |
|            | 12m vs 12m       | Non-self |            | 0.640      | <0.001     | <0.001     | <0.001           | <0.001       | <0.001       | <0.001   |
|            | 12m vs 24m       | Non-self | 0.640      |            | <0.001     | <0.001     | <0.001           | <0.001       | <0.001       | <0.001   |
|            | 12m vs 24m       | Self     | <0.001     | <0.001     |            | 0.793      | 0.068            | 0.148        | <0.001       | 0.219    |
| 24m vs 24m | Non-self         | <0.001   | <0.001     | 0.793      |            | <0.001     | 0.006            | <0.001       | 0.028        |          |
| Mother     | W26-28 vs W26-28 | Non-self | <0.001     | <0.001     | 0.068      | <0.001     |                  | 0.374        | <0.001       | 0.178    |
|            | W26-28 vs 6m     | Non-self | <0.001     | <0.001     | 0.148      | 0.006      | 0.374            |              | <0.001       | 0.626    |
|            | W26-28 vs 6m     | Self     | <0.001     | <0.001     | <0.001     | <0.001     | <0.001           | <0.001       |              | <0.001   |
|            | 6m vs 6m         | Non-self | <0.001     | <0.001     | 0.219      | 0.028      | 0.178            | 0.626        | <0.001       |          |





|                                 |          | Child:<br>gut vs oral (self) |        |        | Child:<br>gut vs oral (non-self) |        |        | Mother:<br>gut vs oral (self) | Mother:<br>gut vs oral (non-self) |
|---------------------------------|----------|------------------------------|--------|--------|----------------------------------|--------|--------|-------------------------------|-----------------------------------|
|                                 |          | 6m                           | 12m    | 24m    | 6m                               | 12m    | 24m    | W26-28                        | W26-28                            |
| Gut: child vs mother            | Neonatal | 0.760                        | <0.001 | <0.001 | 0.390                            | <0.001 | <0.001 | <0.001                        | <0.001                            |
|                                 | 6m       | 0.628                        | <0.001 | <0.001 | 0.073                            | <0.001 | <0.001 | <0.001                        | <0.001                            |
|                                 | 12m      | <0.001                       | <0.001 | <0.001 | <0.001                           | <0.001 | <0.001 | <0.001                        | <0.001                            |
|                                 | 24m      | <0.001                       | <0.001 | <0.001 | <0.001                           | <0.001 | <0.001 | <0.001                        | <0.001                            |
| Gut: child vs unrelated mother  | Neonatal | 0.493                        | <0.001 | <0.001 | 0.574                            | <0.001 | <0.001 | <0.001                        | <0.001                            |
|                                 | 6m       | 0.523                        | <0.001 | <0.001 | 0.043                            | <0.001 | <0.001 | <0.001                        | <0.001                            |
|                                 | 12m      | <0.001                       | <0.001 | <0.001 | <0.001                           | <0.001 | <0.001 | <0.001                        | <0.001                            |
|                                 | 24m      | <0.001                       | <0.001 | <0.001 | <0.001                           | <0.001 | <0.001 | <0.001                        | <0.001                            |
| Oral: child vs mother           | 6m       | <0.001                       | <0.001 | <0.001 | <0.001                           | <0.001 | <0.001 | <0.001                        | <0.001                            |
|                                 | 12m      | <0.001                       | <0.001 | <0.001 | <0.001                           | <0.001 | <0.001 | <0.001                        | <0.001                            |
|                                 | 24m      | <0.001                       | <0.001 | <0.001 | <0.001                           | <0.001 | <0.001 | <0.001                        | <0.001                            |
| Oral: child vs unrelated mother | 6m       | <0.001                       | <0.001 | <0.001 | <0.001                           | <0.001 | <0.001 | <0.001                        | <0.001                            |
|                                 | 12m      | <0.001                       | <0.001 | <0.001 | <0.001                           | <0.001 | <0.001 | <0.001                        | <0.001                            |
|                                 | 24m      | <0.001                       | <0.001 | <0.001 | <0.001                           | <0.001 | <0.001 | <0.001                        | <0.001                            |
| Child: gut vs oral (self)       | 6m       |                              | <0.001 | <0.001 | 0.190                            | <0.001 | <0.001 | <0.001                        | <0.001                            |
|                                 | 12m      | <0.001                       |        | 0.024  | <0.001                           | 0.639  | 0.008  | 0.001                         | <0.001                            |
|                                 | 24m      | <0.001                       | 0.024  |        | <0.001                           | 0.022  | 0.829  | 0.218                         | 0.092                             |
| Child: gut vs oral (non-self)   | 6m       | 0.190                        | <0.001 | <0.001 |                                  | <0.001 | <0.001 | <0.001                        | <0.001                            |
|                                 | 12m      | <0.001                       | 0.639  | 0.022  | <0.001                           |        | 0.001  | <0.001                        | <0.001                            |
|                                 | 24m      | <0.001                       | 0.008  | 0.829  | <0.001                           | 0.001  |        | 0.064                         | <0.001                            |
| Mother: gut vs oral (self)      | W26-28   | <0.001                       | 0.001  | 0.218  | <0.001                           | <0.001 | 0.064  |                               | 0.910                             |
| Mother: gut vs oral (non-self)  | W26-28   | <0.001                       | <0.001 | 0.092  | <0.001                           | <0.001 | <0.001 | 0.910                         |                                   |

Supplementary Table S9. Shared operational taxonomic units (OTUs) between faecal and saliva samples in children. The number of children, at each sampling occasion, with a specific OTU detected in both the faecal and saliva sample. M = month.

| Taxonomy                                                                                     | OTU number | 6 m<br>n=50 | 12 m<br>n=44 | 24 m<br>n=35 |
|----------------------------------------------------------------------------------------------|------------|-------------|--------------|--------------|
| Firmicutes;Negativicutes;Selenomonadales;Veillonellaceae;Veillonella                         | 5          | 46          | 36           | 15           |
| Firmicutes;Bacilli;Lactobacillales;Streptococcaceae;Streptococcus                            | 3          | 37          | 18           | 16           |
| Firmicutes;Bacilli;Lactobacillales;Streptococcaceae;Streptococcus                            | 17         | 35          | 31           | 28           |
| Firmicutes;Negativicutes;Selenomonadales;Veillonellaceae;Veillonella                         | 183        | 34          | 15           | 2            |
| Proteobacteria;Gammaproteobacteria;Pasteurellales;Pasteurellaceae;Haemophilus                | 6          | 31          | 35           | 28           |
| Firmicutes;Negativicutes;Selenomonadales;Veillonellaceae;Veillonella                         | 30         | 28          | 15           | 1            |
| Firmicutes;Negativicutes;Selenomonadales;Veillonellaceae;Veillonella                         | 256        | 20          | 9            | .            |
| Actinobacteria;Actinobacteria;Micrococcales;Micrococcaceae;Rothia                            | 16         | 18          | 4            | 1            |
| Firmicutes;Bacilli;Lactobacillales;Streptococcaceae;Streptococcus                            | 53         | 18          | 8            | 7            |
| Firmicutes;Negativicutes;Selenomonadales;Veillonellaceae;Veillonella                         | 420        | 17          | 7            | .            |
| Firmicutes;Bacilli;Lactobacillales;Lactobacillales_unclassified;Lactobacillales_unclassified | 567        | 14          | 6            | .            |
| Firmicutes;Negativicutes;Selenomonadales;Veillonellaceae;Veillonella                         | 76         | 13          | 11           | 5            |
| Bacteroidetes;Bacteroidia;Bacteroidales;Bacteroidaceae;Bacteroides                           | 1          | 12          | 10           | 8            |
| Firmicutes;Bacilli;Lactobacillales;Lactobacillales_unclassified;Lactobacillales_unclassified | 166        | 12          | 2            | .            |
| Firmicutes;Clostridia;Clostridiales;Ruminococcaceae;Faecalibacterium                         | 8          | 10          | 11           | 13           |
| Actinobacteria;Actinobacteria;Actinomycetales;Actinomycetaceae;Actinomyces                   | 222        | 9           | 2            | 2            |
| Firmicutes;Bacilli;Lactobacillales;Carnobacteriaceae;Carnobacteriaceae_unclassified          | 613        | 9           | 1            | .            |
| Firmicutes;Bacilli;Lactobacillales;Streptococcaceae;Streptococcus                            | 469        | 9           | 6            | 2            |
| Firmicutes;Negativicutes;Selenomonadales;Veillonellaceae;Megasphaera                         | 235        | 9           | 6            | .            |
| Proteobacteria;Gammaproteobacteria;Betaproteobacteriales;Neisseriaceae;Neisseria             | 9          | 9           | 3            | 3            |
| Proteobacteria;Gammaproteobacteria;Enterobacteriales;Enterobacteriaceae;Escherichia-Shigella | 2          | 9           | 8            | 1            |
| Firmicutes;Bacilli;Lactobacillales;Streptococcaceae;Streptococcus                            | 163        | 8           | 4            | 1            |
| Firmicutes;Clostridia;Clostridiales;Lachnospiraceae;Agathobacter                             | 13         | 8           | 9            | 13           |
| Fusobacteria;Fusobacteriia;Fusobacteriales;Fusobacteriaceae;Fusobacterium                    | 24         | 8           | 8            | 1            |
| Epsilonbacteraeota;Campylobacteria;Campylobacteriales;Campylobacteraceae;Campylobacter       | 70         | 7           | 1            | 1            |

| Taxonomy                                                                                           | OTU number | 6 m n=50 | 12 m n=44 | 24 m n=35 |
|----------------------------------------------------------------------------------------------------|------------|----------|-----------|-----------|
| Firmicutes;Bacilli;Lactobacillales;Streptococcaceae;Streptococcus                                  | 155        | 7        | 3         | .         |
| Firmicutes;Negativicutes;Selenomonadales;Veillonellaceae;Veillonella                               | 791        | 7        | 3         | .         |
| Proteobacteria;Gammaproteobacteria;Pasteurellales;Pasteurellaceae;Haemophilus                      | 115        | 7        | 2         | 1         |
| Actinobacteria;Actinobacteria;Bifidobacteriales;Bifidobacteriaceae;Bifidobacterium                 | 7          | 6        | 2         | 7         |
| Firmicutes;Bacilli;Lactobacillales;Carnobacteriaceae;Granulicatella                                | 75         | 6        | 7         | 3         |
| Firmicutes;Negativicutes;Selenomonadales;Veillonellaceae;Veillonella                               | 464        | 6        | 1         | .         |
| Actinobacteria;Actinobacteria;Bifidobacteriales;Bifidobacteriaceae;Bifidobacterium                 | 21         | 5        | 6         | 8         |
| Firmicutes;Bacilli;Bacillales;Family_XI;Gemella                                                    | 74         | 5        | 2         | 2         |
| Firmicutes;Bacilli;Bacillales;Staphylococcaceae;Staphylococcus                                     | 20         | 5        | 2         | .         |
| Firmicutes;Clostridia;Clostridiales;Lachnospiraceae;Anaerostipes                                   | 31         | 5        | 6         | 5         |
| Firmicutes;Negativicutes;Selenomonadales;Veillonellaceae;Veillonella                               | 758        | 5        | 1         | .         |
| Proteobacteria;Gammaproteobacteria;Enterobacteriales;Enterobacteriaceae;Enterobacteriaceae_unclas  | 19         | 5        | 6         | .         |
| Proteobacteria;Gammaproteobacteria;Pasteurellales;Pasteurellaceae;Haemophilus                      | 120        | 5        | .         | 2         |
| Proteobacteria;Gammaproteobacteria;Pasteurellales;Pasteurellaceae;Pasteurellaceae_unclassified     | 867        | 5        | 3         | .         |
| Actinobacteria;Actinobacteria;Bifidobacteriales;Bifidobacteriaceae;Bifidobacteriaceae_unclassified | 1019       | 4        | 2         | .         |
| Bacteroidetes;Bacteroidia;Bacteroidales;Bacteroidaceae;Bacteroides                                 | 10         | 4        | 3         | 3         |
| Firmicutes;Bacilli;Lactobacillales;Lactobacillales_unclassified;Lactobacillales_unclassified       | 371        | 4        | .         | 1         |
| Firmicutes;Negativicutes;Selenomonadales;Veillonellaceae;Veillonella                               | 399        | 4        | 2         | .         |
| Firmicutes;Negativicutes;Selenomonadales;Veillonellaceae;Veillonella                               | 769        | 4        | 4         | .         |
| Firmicutes;Negativicutes;Selenomonadales;Veillonellaceae;Veillonella                               | 823        | 4        | 1         | .         |
| Firmicutes;Negativicutes;Selenomonadales;Veillonellaceae;Veillonella                               | 922        | 4        | 1         | .         |
| Firmicutes;Bacilli;Lactobacillales;Streptococcaceae;Streptococcus                                  | 151        | 3        | 3         | 2         |
| Patescibacteria;Saccharimonadia;Saccharimonadales;Saccharimonadaceae;Saccharimonadaceae_ge         | 33         | 3        | 2         | 2         |
| Proteobacteria;Gammaproteobacteria;Pasteurellales;Pasteurellaceae;Pasteurellaceae_unclassified     | 271        | 3        | 2         | 1         |
| Proteobacteria;Gammaproteobacteria;Pasteurellales;Pasteurellaceae;Pasteurellaceae_unclassified     | 439        | 3        | 2         | 1         |
| Proteobacteria;Gammaproteobacteria;Pasteurellales;Pasteurellaceae;Pasteurellaceae_unclassified     | 472        | 3        | 8         | 3         |



| Taxonomy                                                                                       | OTU number | 6 m<br>n=50 | 12 m<br>n=44 | 24 m<br>n=35 |
|------------------------------------------------------------------------------------------------|------------|-------------|--------------|--------------|
| Proteobacteria;Gammaproteobacteria;Pasteurellales;Pasteurellaceae;Pasteurellaceae_unclassified | 579        | 3           | 3            | 1            |
| Bacteroidetes;Bacteroidia;Bacteroidales;Bacteroidaceae;Bacteroides                             | 4          | 2           | 2            | 5            |
| Firmicutes;Clostridia;Clostridiales;Lachnospiraceae;Blautia                                    | 22         | 2           | 7            | 8            |
| Firmicutes;Clostridia;Clostridiales;Lachnospiraceae;Oribacterium                               | 90         | 2           | 2            | 1            |
| Firmicutes;Clostridia;Clostridiales;Peptostreptococcaceae;Intestinibacter                      | 15         | 2           | 1            | 2            |
| Proteobacteria;Gammaproteobacteria;Pasteurellales;Pasteurellaceae;Haemophilus                  | 252        | 2           | 2            | 4            |
| Proteobacteria;Gammaproteobacteria;Pasteurellales;Pasteurellaceae;Pasteurellaceae_unclassified | 316        | 2           | 4            | 2            |
| Proteobacteria;Gammaproteobacteria;Pasteurellales;Pasteurellaceae;Pasteurellaceae_unclassified | 529        | 2           | 15           | 11           |
| Bacteroidetes;Bacteroidia;Bacteroidales;Bacteroidaceae;Bacteroides                             | 26         | 1           | 2            | 5            |
| Firmicutes;Clostridia;Clostridiales;Clostridiaceae_;Clostridium_sensu_stricto_                 | 28         | 1           | 1            | 3            |
| Firmicutes;Clostridia;Clostridiales;Lachnospiraceae;Lachnospiraceae_ge                         | 55         | 1           | 3            | 4            |
| Firmicutes;Clostridia;Clostridiales;Lachnospiraceae;Lachnospiraceae_unclassified               | 117        | 1           | .            | 4            |
| Firmicutes;Clostridia;Clostridiales;Ruminococcaceae;Subdoligranulum                            | 36         | 1           | 1            | 4            |
| Proteobacteria;Gammaproteobacteria;Pasteurellales;Pasteurellaceae;Actinobacillus               | 234        | 1           | 4            | 3            |
| Proteobacteria;Gammaproteobacteria;Pasteurellales;Pasteurellaceae;Haemophilus                  | 241        | 1           | 2            | 7            |
| Verrucomicrobia;Verrucomicrobiae;Verrucomicrobiales;Akkermansiaceae;Akkermansia                | 12         | 1           | 1            | 5            |
| Firmicutes;Clostridia;Clostridiales;Lachnospiraceae;Blautia                                    | 51         | .           | 2            | 5            |
| Firmicutes;Clostridia;Clostridiales;Lachnospiraceae;Fusicatenibacter                           | 44         | .           | 2            | 6            |
| Firmicutes;Clostridia;Clostridiales;Lachnospiraceae;Roseburia                                  | 79         | .           | .            | 5            |
| Firmicutes;Clostridia;Clostridiales;Ruminococcaceae;Ruminococcus_                              | 68         | .           | 2            | 5            |
| Firmicutes;Clostridia;Clostridiales;Ruminococcaceae;Ruminococcus_                              | 165        | .           | 2            | 5            |

Supplementary Table S10. Shared operational taxonomic units (OTUs) between faecal and saliva samples in mothers. The number of mothers with a specific OTU detected in both the faecal and saliva sample. W = gestational week.

| Taxonomy                                                                                           | OTU number | W26-28 n=67 |
|----------------------------------------------------------------------------------------------------|------------|-------------|
| Firmicutes; Bacilli; Lactobacillales; Streptococcaceae; Streptococcus                              | 17         | 49          |
| Proteobacteria; Gammaproteobacteria; Pasteurellales; Pasteurellaceae; Haemophilus                  | 6          | 27          |
| Firmicutes; Negativicutes; Selenomonadales; Veillonellaceae; Veillonella                           | 5          | 26          |
| Firmicutes; Clostridia; Clostridiales; Ruminococcaceae; Faecalibacterium                           | 8          | 19          |
| Firmicutes; Bacilli; Lactobacillales; Streptococcaceae; Streptococcus                              | 3          | 17          |
| Bacteroidetes; Bacteroidia; Bacteroidales; Bacteroidaceae; Bacteroides                             | 1          | 16          |
| Firmicutes; Clostridia; Clostridiales; Lachnospiraceae; Agathobacter                               | 13         | 15          |
| Actinobacteria; Actinobacteria; Bifidobacteriales; Bifidobacteriaceae; Bifidobacterium             | 21         | 14          |
| Firmicutes; Negativicutes; Selenomonadales; Veillonellaceae; Dialister                             | 91         | 14          |
| Firmicutes; Negativicutes; Selenomonadales; Veillonellaceae; Veillonella                           | 30         | 13          |
| Actinobacteria; Actinobacteria; Micrococcales; Micrococcaceae; Rothia                              | 16         | 10          |
| Firmicutes; Clostridia; Clostridiales; Lachnospiraceae; Blautia                                    | 22         | 10          |
| Firmicutes; Bacilli; Lactobacillales; Streptococcaceae; Streptococcus                              | 53         | 10          |
| Firmicutes; Clostridia; Clostridiales; Lachnospiraceae; Anaerostipes                               | 31         | 9           |
| Proteobacteria; Gammaproteobacteria; Pasteurellales; Pasteurellaceae; Pasteurellaceae_unclassified | 529        | 9           |
| Proteobacteria; Gammaproteobacteria; Enterobacteriales; Enterobacteriaceae; Escherichia-Shigella   | 2          | 8           |
| Bacteroidetes; Bacteroidia; Bacteroidales; Bacteroidaceae; Bacteroides                             | 10         | 8           |
| Firmicutes; Clostridia; Clostridiales; Ruminococcaceae; Subdoligranulum                            | 36         | 8           |
| Firmicutes; Negativicutes; Selenomonadales; Veillonellaceae; Veillonella                           | 183        | 7           |
| Actinobacteria; Actinobacteria; Actinomycetales; Actinomycetaceae; Actinomyces                     | 222        | 7           |
| Firmicutes; Clostridia; Clostridiales; Ruminococcaceae; Subdoligranulum                            | 47         | 6           |
| Actinobacteria; Actinobacteria; Bifidobacteriales; Bifidobacteriaceae; Bifidobacterium             | 7          | 5           |
| Bacteroidetes; Bacteroidia; Bacteroidales; Bacteroidaceae; Bacteroides                             | 26         | 5           |
| Firmicutes; Clostridia; Clostridiales; Lachnospiraceae; Fusicatenibacter                           | 44         | 5           |
| Firmicutes; Clostridia; Clostridiales; Lachnospiraceae; Blautia                                    | 51         | 5           |
| Firmicutes; Clostridia; Clostridiales; Lachnospiraceae; Lachnospiraceae_ge                         | 55         | 5           |
| Firmicutes; Bacilli; Lactobacillales; Streptococcaceae; Streptococcus                              | 151        | 5           |

| <b>Taxonomy</b>                                                                                   | <b>OTU number</b> | <b>W26-28 n=67</b> |
|---------------------------------------------------------------------------------------------------|-------------------|--------------------|
| Firmicutes;Clostridia;Clostridiales;Lachnospiraceae;Coproccoccus_                                 | 299               | 5                  |
| Firmicutes;Bacilli;Lactobacillales;Streptococcaceae;Streptococcus                                 | 469               | 5                  |
| Firmicutes;Clostridia;Clostridiales;Lachnospiraceae;Lachnospiraceae_ge                            | 27                | 4                  |
| Firmicutes;Clostridia;Clostridiales;Clostridiaceae_;Clostridium_sensu_stricto_                    | 28                | 4                  |
| Bacteroidetes;Bacteroidia;Bacteroidales;Bacteroidaceae;Bacteroides                                | 29                | 4                  |
| Bacteroidetes;Bacteroidia;Bacteroidales;Bacteroidaceae;Bacteroides                                | 35                | 4                  |
| Firmicutes;Clostridia;Clostridiales;Ruminococcaceae;Ruminococcus_                                 | 52                | 4                  |
| Firmicutes;Clostridia;Clostridiales;Lachnospiraceae;Roseburia                                     | 79                | 4                  |
| Bacteroidetes;Bacteroidia;Bacteroidales;Rikenellaceae;Alistipes                                   | 88                | 4                  |
| Firmicutes;Clostridia;Clostridiales;Peptostreptococcaceae;Romboutsia                              | 96                | 4                  |
| Bacteroidetes;Bacteroidia;Bacteroidales;Bacteroidaceae;Bacteroides                                | 123               | 4                  |
| Firmicutes;Clostridia;Clostridiales;Ruminococcaceae;Faecalibacterium                              | 132               | 4                  |
| Firmicutes;Bacilli;Lactobacillales;Streptococcaceae;Streptococcus                                 | 163               | 4                  |
| Firmicutes;Clostridia;Clostridiales;Ruminococcaceae;Ruminococcus_                                 | 165               | 4                  |
| Firmicutes;Clostridia;Clostridiales;Lachnospiraceae;Lachnospiraceae_ND_group                      | 208               | 4                  |
| Proteobacteria;Gammaproteobacteria;Pasteurellales;Pasteurellaceae;Pasteurellaceae_unclassified    | 472               | 4                  |
| Firmicutes;Firmicutes_unclassified;Firmicutes_unclassified;Firmicutes_unclassified;Firmicutes_unc | 2021              | 4                  |
| Proteobacteria;Gammaproteobacteria;Betaproteobacteriales;Neisseriaceae;Neisseria                  | 9                 | 3                  |
| Verrucomicrobia;Verrucomicrobiae;Verrucomicrobiales;Akkermansiaceae;Akkermansia                   | 12                | 3                  |
| Firmicutes;Clostridia;Clostridiales;Peptostreptococcaceae;Intestinibacter                         | 15                | 3                  |
| Firmicutes;Bacilli;Bacillales;Staphylococcaceae;Staphylococcus                                    | 20                | 3                  |
| Fusobacteria;Fusobacteriia;Fusobacteriales;Fusobacteriaceae;Fusobacterium                         | 24                | 3                  |
| Firmicutes;Clostridia;Clostridiales;Ruminococcaceae;Ruminococcaceae_UCG-                          | 34                | 3                  |
| Bacteroidetes;Bacteroidia;Bacteroidales;Bacteroidaceae;Bacteroides                                | 37                | 3                  |
| Bacteroidetes;Bacteroidia;Bacteroidales;Rikenellaceae;Alistipes                                   | 42                | 3                  |
| Actinobacteria;Actinobacteria;Bifidobacteriales;Bifidobacteriaceae;Bifidobacterium                | 46                | 3                  |
| Firmicutes;Clostridia;Clostridiales;Ruminococcaceae;Ruminococcus_                                 | 68                | 3                  |
| Firmicutes;Bacilli;Lactobacillales;Carnobacteriaceae;Granulicatella                               | 75                | 3                  |
| Bacteroidetes;Bacteroidia;Bacteroidales;Bacteroidaceae;Bacteroides                                | 78                | 3                  |
| Firmicutes;Clostridia;Clostridiales;Lachnospiraceae;Blautia                                       | 81                | 3                  |

| <b>Taxonomy</b>                                                                                | <b>OTU number</b> | <b>W26-28 n=67</b> |
|------------------------------------------------------------------------------------------------|-------------------|--------------------|
| Firmicutes;Clostridia;Clostridiales;Lachnospiraceae;Lachnospiraceae_unclassified               | 98                | 3                  |
| Firmicutes;Clostridia;Clostridiales;Ruminococcaceae;Ruminococcaceae_ge                         | 106               | 3                  |
| Proteobacteria;Gammaproteobacteria;Pasteurellales;Pasteurellaceae;Haemophilus                  | 252               | 3                  |
| Firmicutes;Clostridia;Clostridiales;Lachnospiraceae;Lachnospiraceae_unclassified               | 284               | 3                  |
| Proteobacteria;Gammaproteobacteria;Pasteurellales;Pasteurellaceae;Pasteurellaceae_unclassified | 867               | 3                  |
| Firmicutes;Bacilli;Lactobacillales;Streptococcaceae;Streptococcus                              | 1210              | 3                  |
| Bacteroidetes;Bacteroidia;Bacteroidales;Bacteroidaceae;Bacteroides                             | 4                 | 2                  |
| Bacteroidetes;Bacteroidia;Bacteroidales;Porphyromonadaceae;Porphyromonas                       | 38                | 2                  |
| Bacteroidetes;Bacteroidia;Bacteroidales;Bacteroidaceae;Bacteroides                             | 39                | 2                  |
| Firmicutes;Negativicutes;Selenomonadales;Veillonellaceae;Veillonella                           | 56                | 2                  |
| Bacteroidetes;Bacteroidia;Bacteroidales;Bacteroidaceae;Bacteroides                             | 62                | 2                  |
| Bacteroidetes;Bacteroidia;Bacteroidales;Bacteroidaceae;Bacteroides                             | 66                | 2                  |
| Bacteroidetes;Bacteroidia;Bacteroidales;Bacteroidaceae;Bacteroides                             | 67                | 2                  |
| Epsilonbacteraeota;Campylobacteria;Campylobacteriales;Campylobacteraceae;Campylobacter         | 70                | 2                  |
| Firmicutes;Clostridia;Clostridiales;Lachnospiraceae;Lachnospira                                | 71                | 2                  |
| Proteobacteria;Gammaproteobacteria;Betaproteobacteriales;Neisseriaceae;Neisseria               | 80                | 2                  |
| Bacteroidetes;Bacteroidia;Bacteroidales;Bacteroidaceae;Bacteroides                             | 92                | 2                  |
| Bacteroidetes;Bacteroidia;Bacteroidales;Bacteroidaceae;Bacteroides                             | 102               | 2                  |
| Firmicutes;Clostridia;Clostridiales;Lachnospiraceae;Lachnospiraceae_unclassified               | 117               | 2                  |
| Bacteroidetes;Bacteroidia;Bacteroidales;Bacteroidaceae;Bacteroides                             | 134               | 2                  |
| Bacteroidetes;Bacteroidia;Bacteroidales;Bacteroidaceae;Bacteroides                             | 158               | 2                  |
| Firmicutes;Clostridia;Clostridiales;Lachnospiraceae;Coprococcus_                               | 170               | 2                  |
| Firmicutes;Clostridia;Clostridiales;Lachnospiraceae;CAG-                                       | 203               | 2                  |
| Bacteroidetes;Bacteroidia;Bacteroidales;Bacteroidaceae;Bacteroides                             | 209               | 2                  |
| Firmicutes;Clostridia;Clostridiales;Lachnospiraceae;Lachnospiraceae_unclassified               | 304               | 2                  |
| Firmicutes;Clostridia;Clostridiales;Lachnospiraceae;Lachnospiraceae_ge                         | 376               | 2                  |
| Firmicutes;Clostridia;Clostridiales;Ruminococcaceae;Ruminococcaceae_unclassified               | 519               | 2                  |
| Actinobacteria;Actinobacteria;Corynebacteriales;Corynebacteriaceae;Corynebacterium             | 694               | 2                  |
| Firmicutes;Clostridia;Clostridiales;Peptostreptococcaceae;Peptostreptococcus                   | 841               | 2                  |

| <b>Taxonomy</b>                                                   | <b>OTU<br/>number</b> | <b>W26-28<br/>n=67</b> |
|-------------------------------------------------------------------|-----------------------|------------------------|
| Firmicutes;Bacilli;Lactobacillales;Streptococcaceae;Streptococcus | 1117                  | 2                      |
| Firmicutes;Bacilli;Lactobacillales;Streptococcaceae;Streptococcus | 3869                  | 2                      |
